# Supplementary material for: Diet, physical activity and screen time but not body mass index are associated with the gut microbiome of a diverse cohort of college students living in university housing: a cross-sectional study
Source: PubMed Central journal article supplement (PMC6291939; doi:10.1186/s12866-018-1362-x), 2018-12-12
Supplement: 12866_2018_1362_MOESM1_ESM.pdf [file 12866_2018_1362_MOESM1_ESM.pdf]

# Moderate-to-Vigorous Physical Activity (min/d)

## Unweighted UniFrac

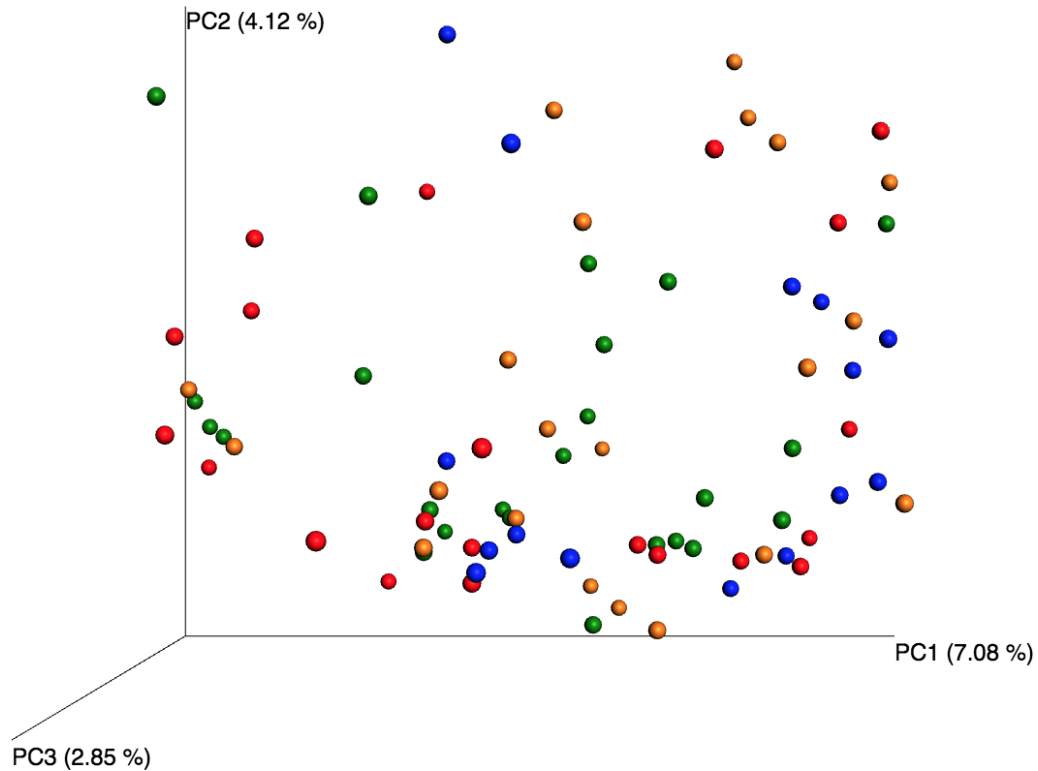

## Weighted UniFrac

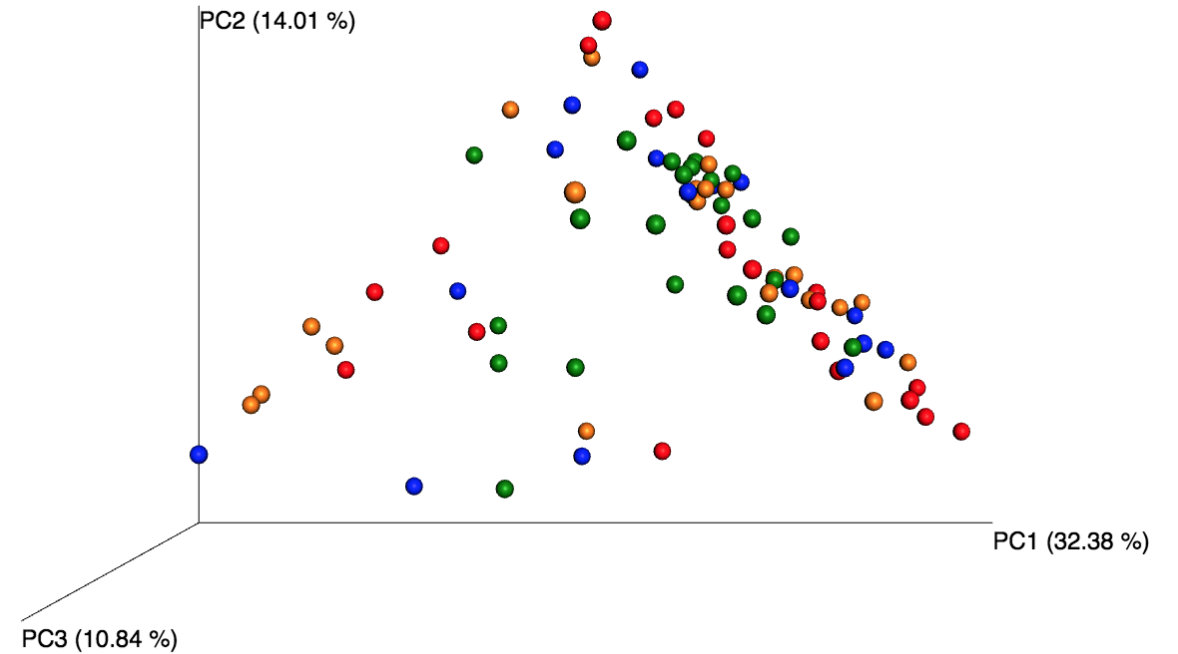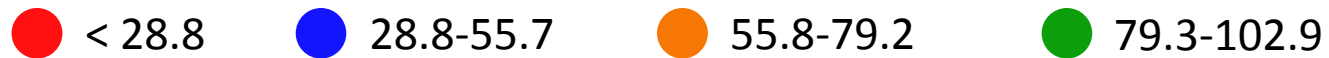

# Screen time (hrs/d)

## Unweighted UniFrac

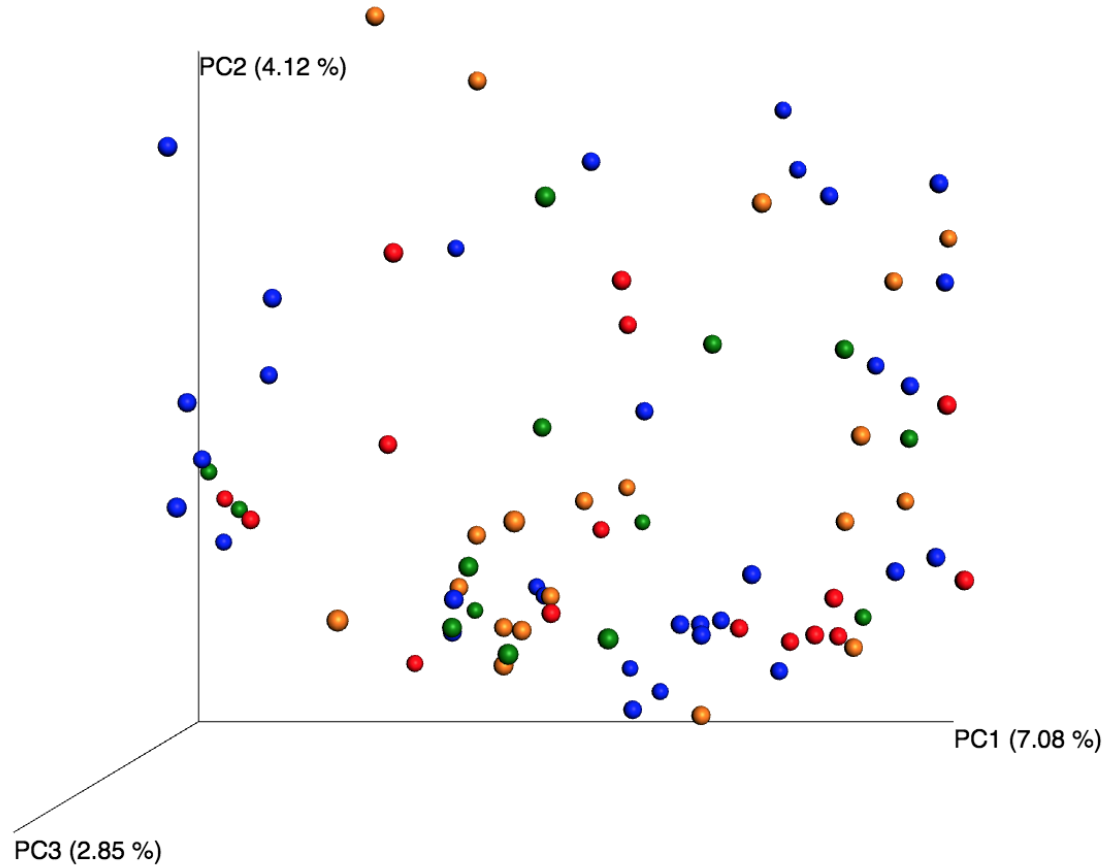

## Weighted UniFrac

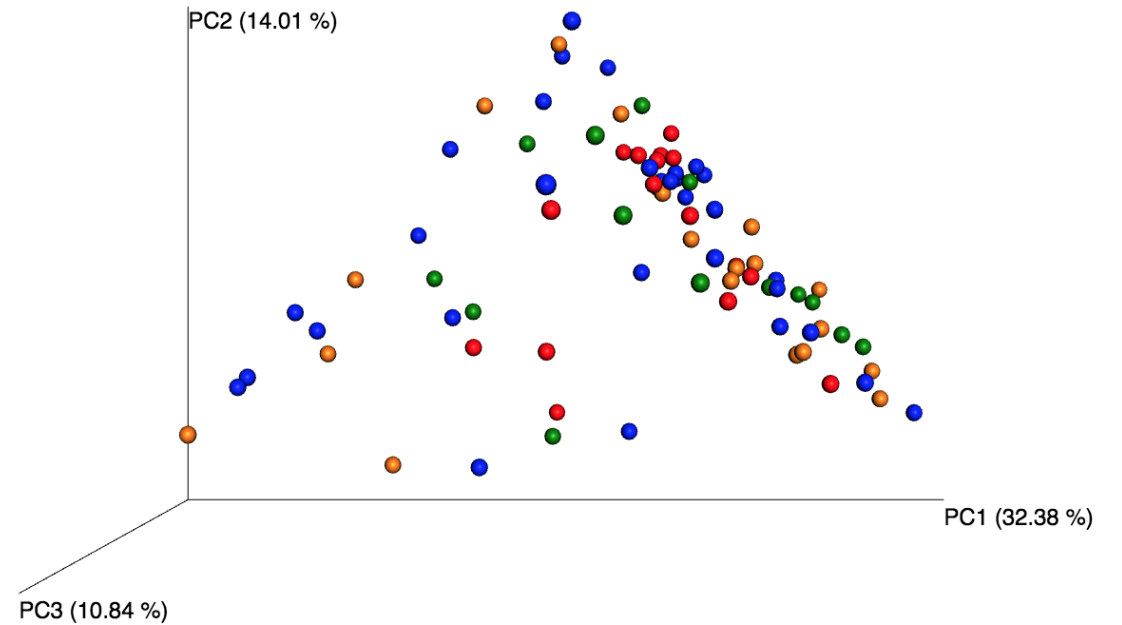

● < 2

● 2.5-4

● 4.5-6

● > 6

# Dietary Protein Intake (g/d)

## Unweighted UniFrac

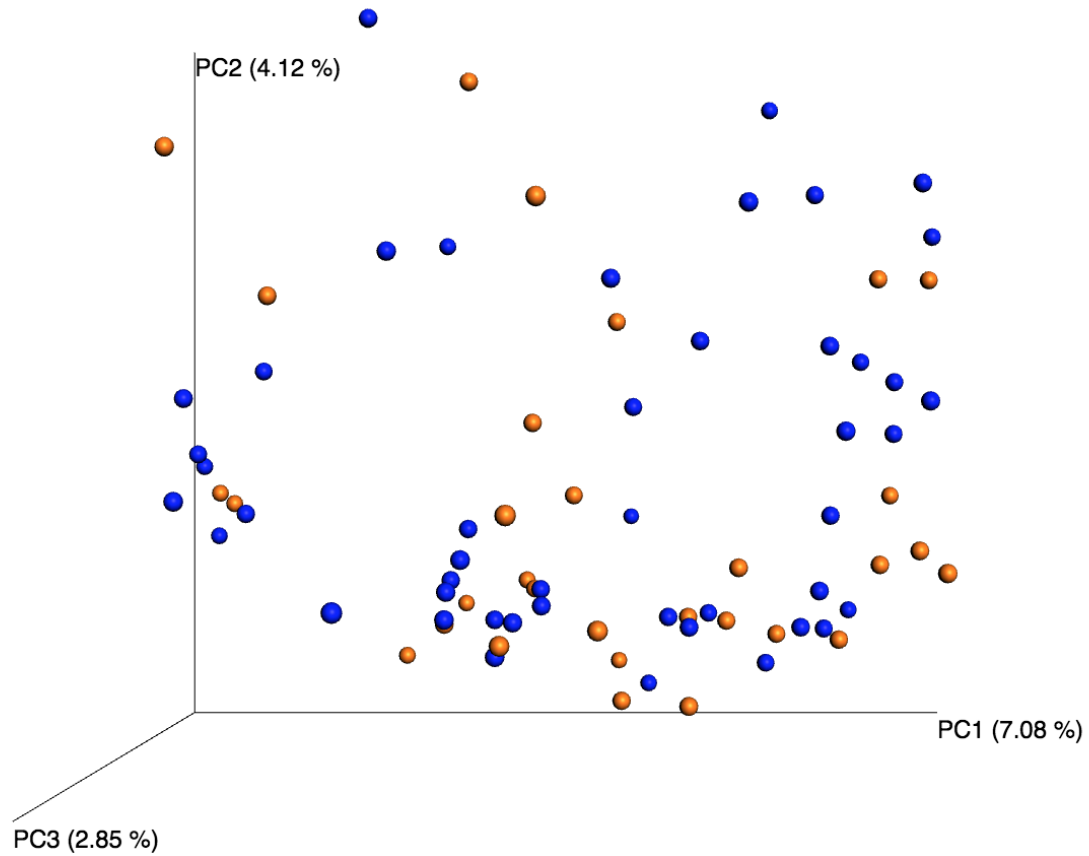

## Weighted UniFrac

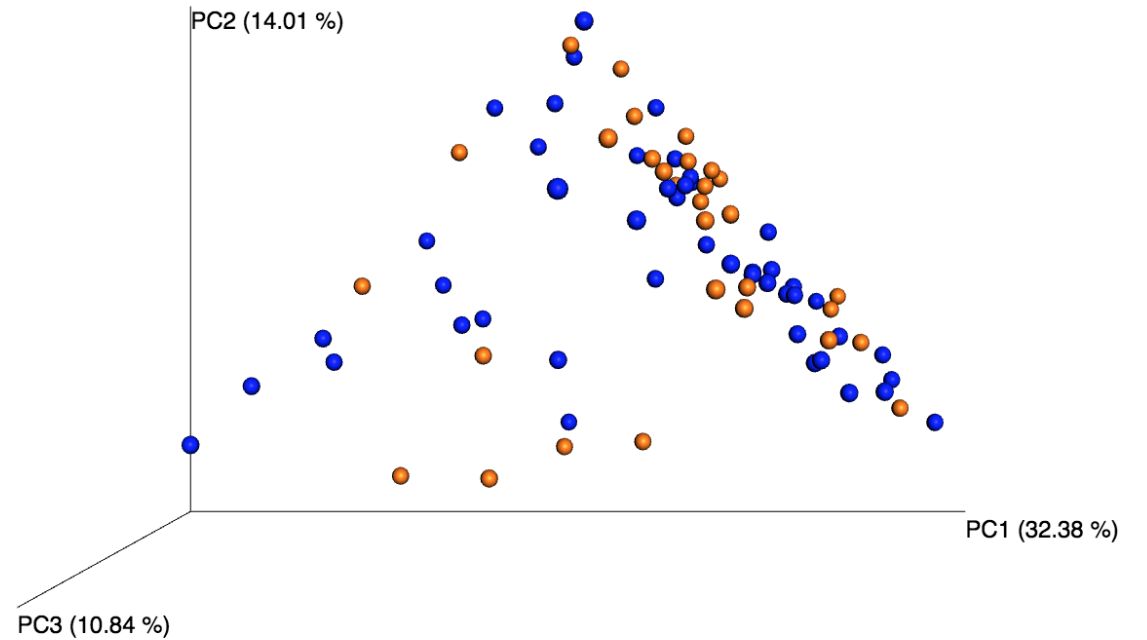

● < 62 g/d      ● > 62 g/d

# Dietary Fat Intake (g/d)

## Unweighted UniFrac

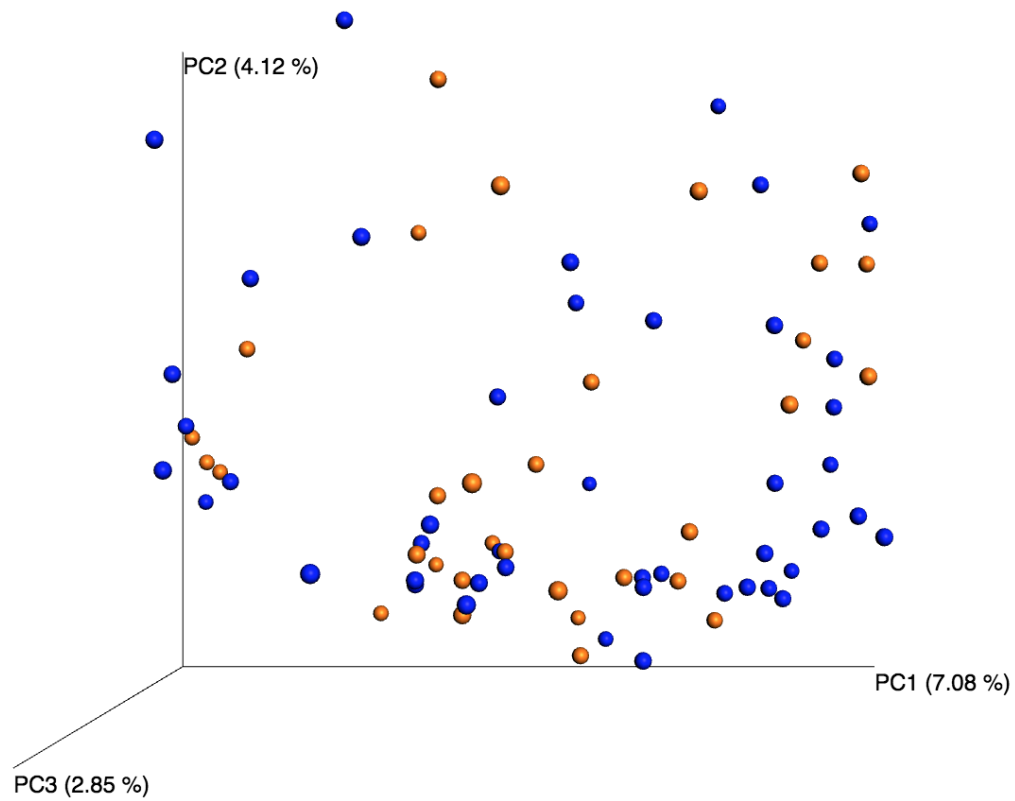

## Weighted UniFrac

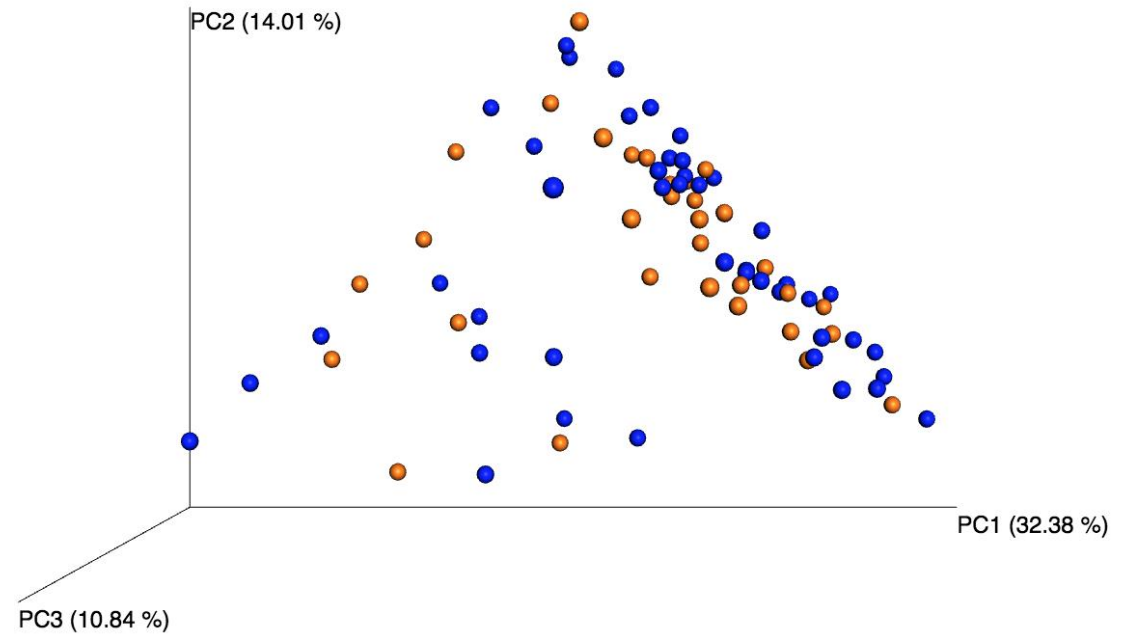

● < 63 g/d      ● > 63 g/d

# Dietary Carbohydrate Intake (g/d)

## Unweighted UniFrac

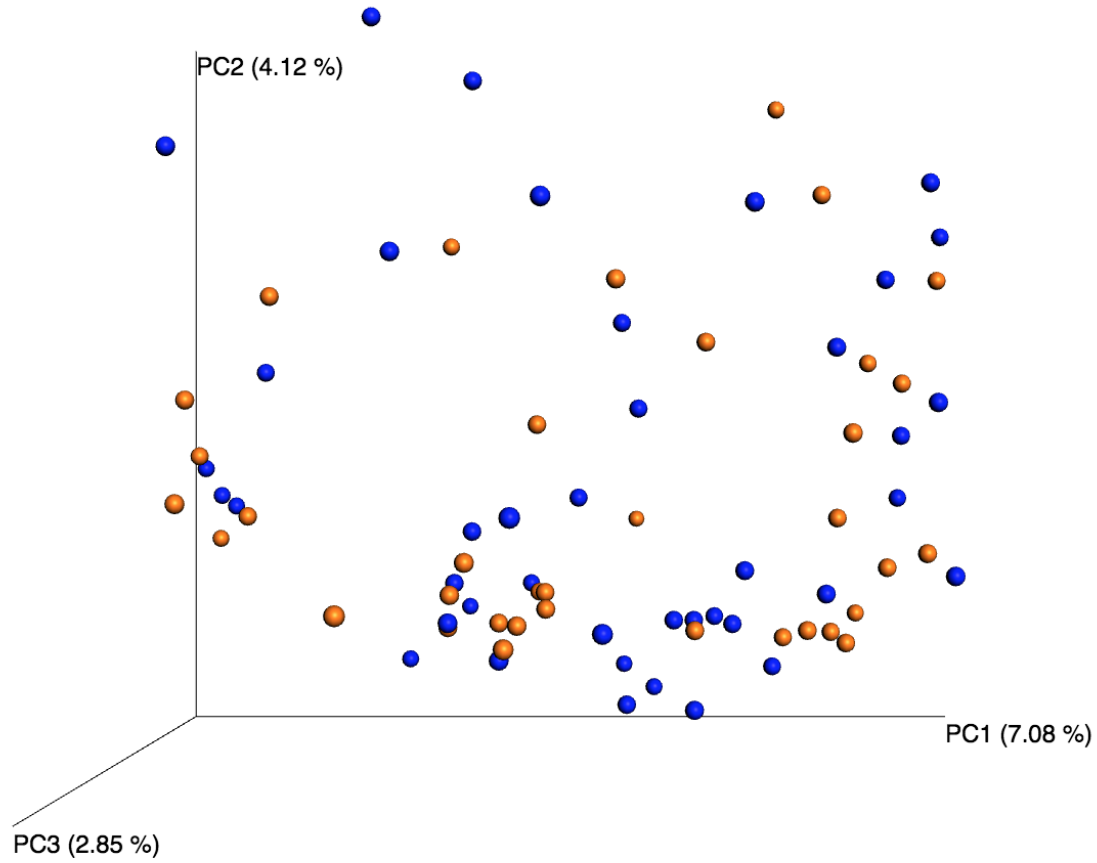

## Weighted UniFrac

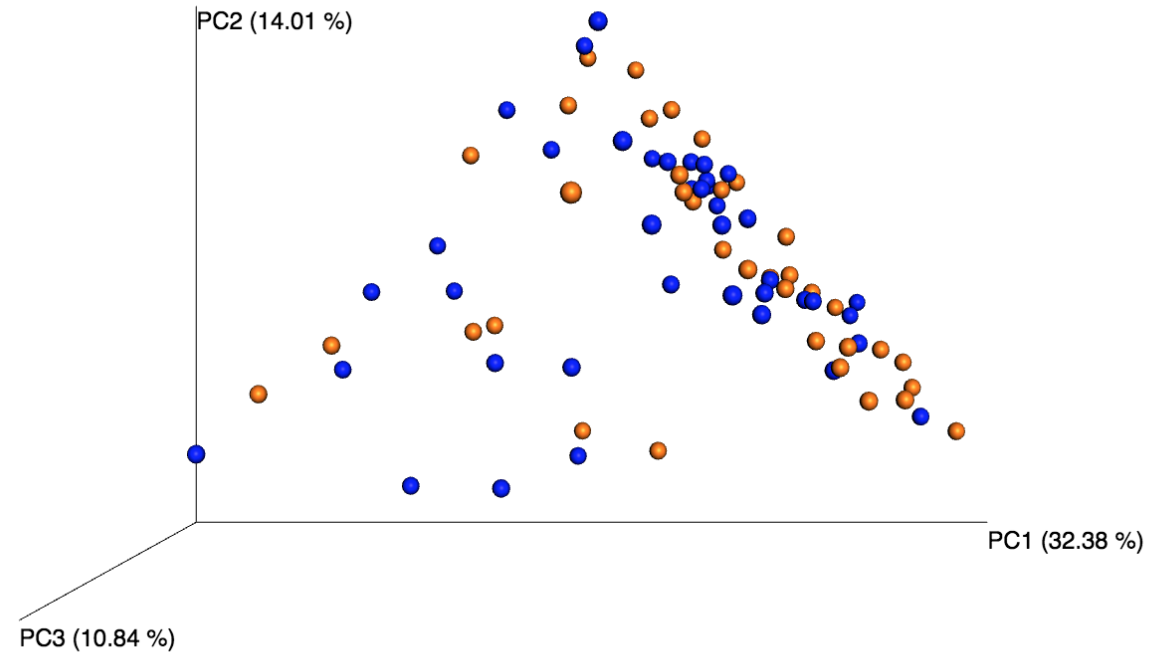

● < 166 g/d      ● > 166 g/d

# Dietary Fiber Intake (g/d)

## Unweighted UniFrac

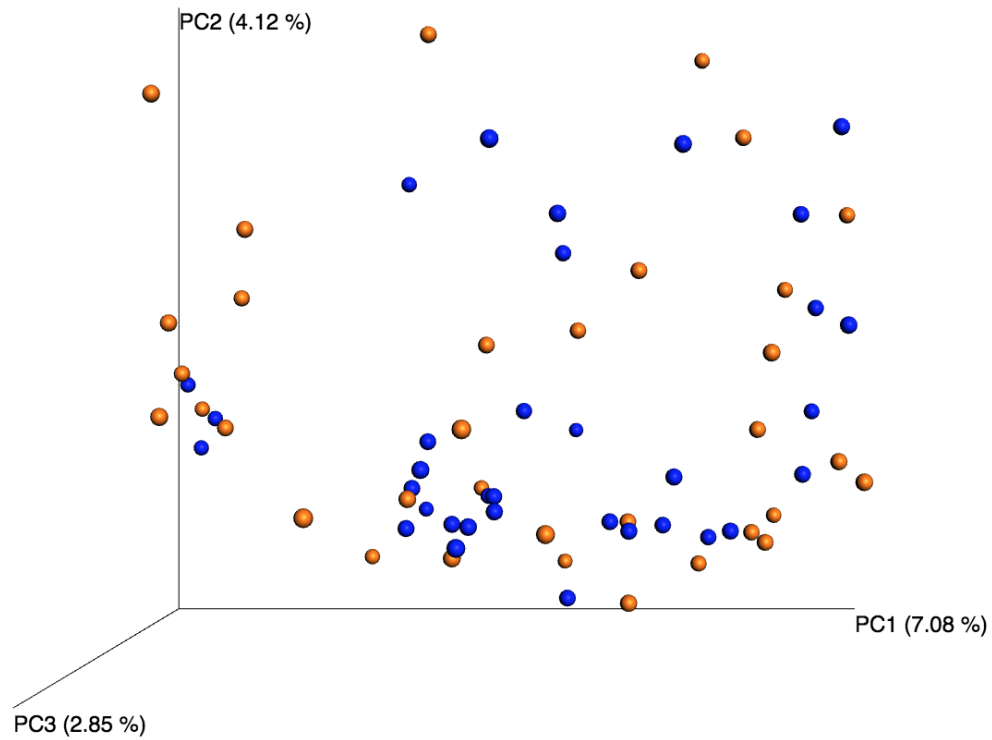

## Weighted UniFrac

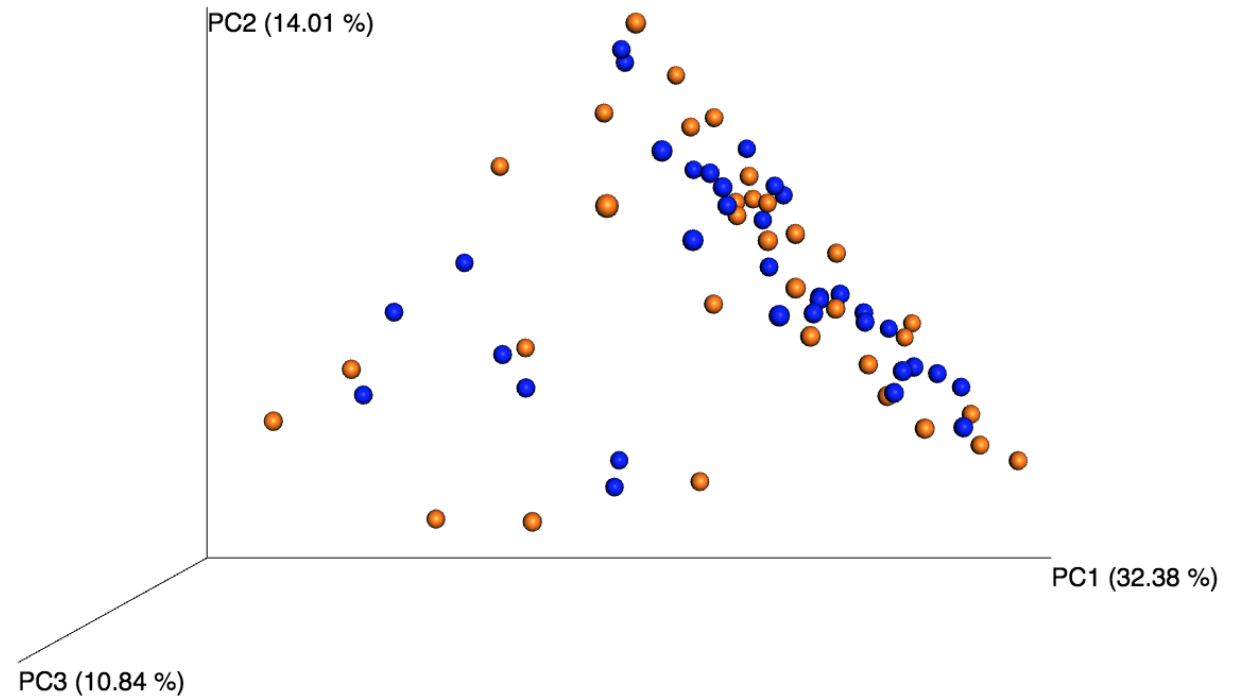

● < 11 g/d      ● > 11 g/d

# Physical Activity and Fiber Mixed Categories

## Unweighted UniFrac

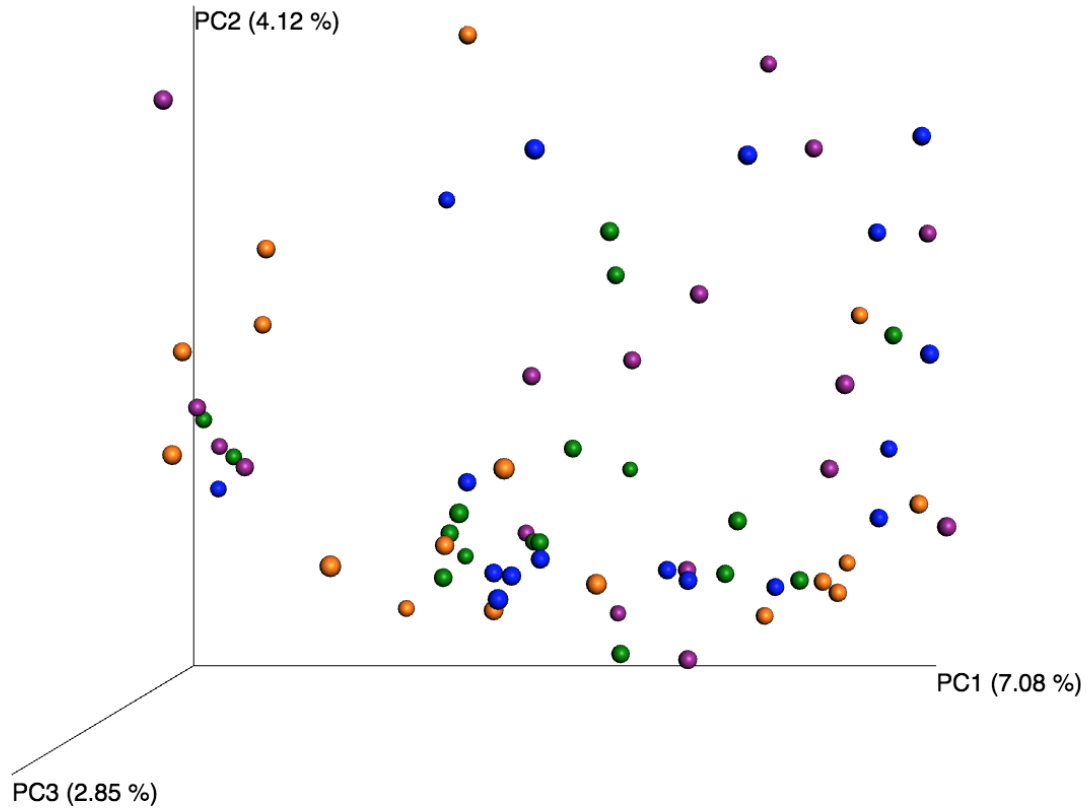

## Weighted UniFrac

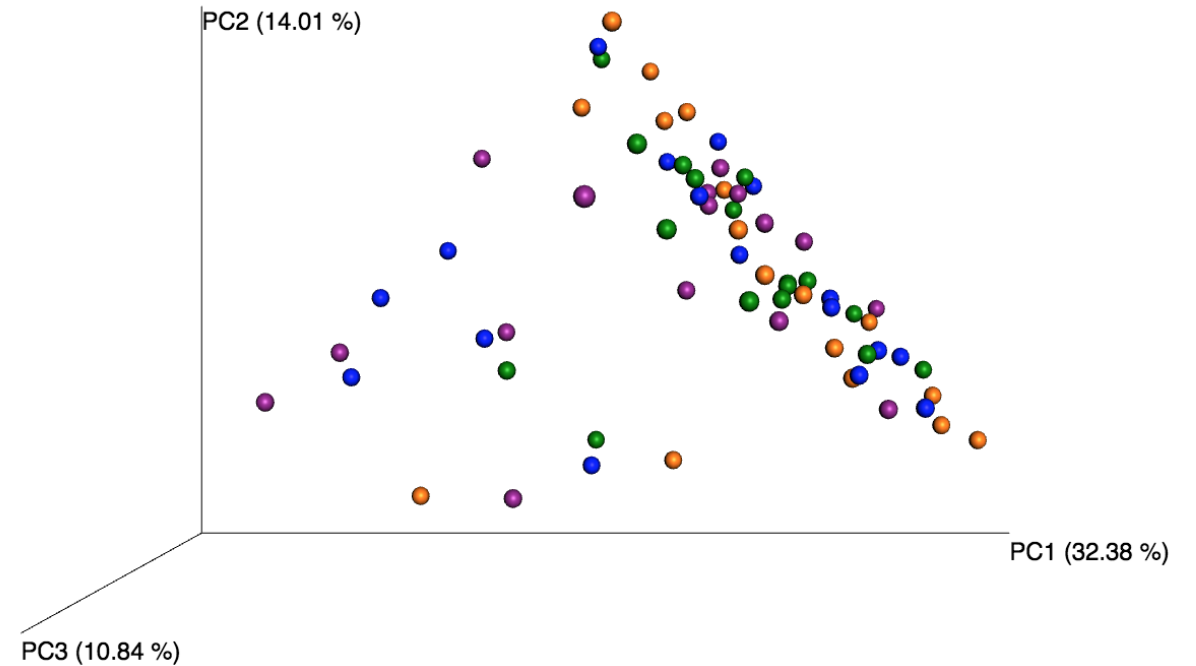

● Low MVPA-Low Fiber

● Low MVPA-High Fiber

● High MVPA-Low Fiber

● High MVPA-High Fiber

MVPA – moderate-to-vigorous physical activity
