# Supplementary material for: Diet, physical activity and screen time but not body mass index are associated with the gut microbiome of a diverse cohort of college students living in university housing: a cross-sectional study
Source: PubMed Central journal article supplement (PMC6291939; doi:10.1186/s12866-018-1362-x), 2018-12-12
Supplement: 12866_2018_1362_MOESM2_ESM.pdf [file 12866_2018_1362_MOESM2_ESM.pdf]

## **Additional File 2. Physical Activity and Sedentary Activity Questionnaire Details**

**Godin-Shephard Leisure-Time Physical Activity:** The questionnaire asked students, “In a usual week, how many hours do you spend doing the following activities: strenuous physical activity (heart beats rapidly), moderate physical activity (not exhausting), and mild physical activity (little effort).” The response options were: none, less than ½ hour per week, ½-2 hours per week, 2½-4 hours per week, 4½-6 hours per week, and more than 6 hours per week. Daily physical activity was calculated and moderate-to-vigorous physical activity (MVPA) was computed by summing the total time spent on strenuous and moderate activity.

**Sedentary Activity Question:** Sedentary activities were also measured by asking: “Yesterday, how much time did you spend in front of a screen (excluding time in class and being physically active)?” Response options included a range from zero to greater than 6 hours which were summed to calculate total time spent doing sedentary activities.
