# Supplementary material for: Diet, physical activity and screen time but not body mass index are associated with the gut microbiome of a diverse cohort of college students living in university housing: a cross-sectional study
Source: BMC Microbiol. 2018 Dec 12;18:210. doi: 10.1186/s12866-018-1362-x (PMC6291939; doi:10.1186/s12866-018-1362-x)
Supplement: Supplementary file 3 — Table showing participant characteristics including demographics, behavioral data and alpha diversity metrics. (XLSX 21 kb) [file 12866_2018_1362_MOESM3_ESM.xlsx]

## Sheet: Sheet1
Subject_ID	Chao1	OTUs	Faith_PD	BMI	Gender	Year_in_school	Dorm	MVPA	Screen_Time	Race_Ethnicity	PROTEIN_percent	FAT_percent	CARB_percent	SUGAR_grams	FIBER_grams
DW02	3641.86	1769.5	73.403	23.68	Male	1	1	55.7143	195	Hispanic
DW03	4600.81	2138.2	74.3463	21.23	Male	1	1	79.2857	315	Other
DW04	2385.05	1286.6	48.0808	30.15	Male	1	1	102.857	0	White
DW05	2480.27	1365.4	59.5367	34.94	Male	1	1	55.7143	195	Hispanic
DW06	4417.19	2005.3	70.3515	25.59	Male	1	1	79.2857	75	Hispanic
DW07	4172.13	2149.3	88.653	23.08	Female	1	1	15	195	Black	0.0533509	0.572422	0.404031	104.052	7.85568
DW08	3416.73	1979.3	70.832	32.17	Male	1	1	90	195	White	0.219577	0.276773	0.515079	93.1555	4.668
DW09	1585.45	1038.9	37.7589	23.48	Female	1	1	45	315	Hispanic
DW10	2554.39	1587.3	66.5649	24.26	Female	1	1	62.1429	315	Hispanic	0.186804	0.420057	0.39375	49.3526	8.80325
DW11	4187.45	1971.7	69.3186	20.57	Male	1	1	55.7143	360	White
DW12	4954.7	2215.6	83.3345	21.16	Female	1	1	10.7143	360	White	0.127193	0.338078	0.545713	101.399	12.7074
DW13	4641.01	1800.1	64.5758	26.94	Female	1	1	55.7143	195	White
DW14	3970.43	2115.6	79.2369	32.56	Female	1	1	38.5714	195	White	0.164518	0.443598	0.395583	35.4535	11.4659
DW15	4046.96	2126.4	80.9568	20.72	Female	1	1	79.2857	0	Hispanic
DW16	4459.52	1607.3	66.8461	21.5	Female	1	1	72.8571	15	White	0.15788	0.312132	0.53328	65.0371	4.16925
DW17	6356.58	2784.1	104.937	31.31	Female	1	1	55.7143	315	Other
DW18	4027.81	1769.4	64.3777	28.79	Male	1	1	90	75	White	0.33172	0.326367	0.341071	51.7806	8.699
DW19	2490.45	1131.7	40.08	22.03	Male	1	1	96.4286	360	White	0.389665	0.449485	0.136258	4.0824	7.147
DW20	3692.7	1554.6	55.2601	21.66	Male	1	1	96.4286	315	White	0.152108	0.242362	0.255621	17.4917	6.195
DW21	2509.28	1622	64.0506	18.99	Female	1	1	0	195	Asian/Pacific Islander	0.137333	0.371526	0.5035	35.1874	10.7698
DW22	3493.92	1682.4	58.0442	23.29	Male	1	1	79.2857	75	Asian/Pacific Islander
DW23	3112.45	1675.3	69.9691	17.61	Female	1	1	45	360	Other
DW24	4104.24	2109.2	81.2689	29.11	Female	1	1	4.28571	315	Black	0.173236	0.302802	0.533251	53.0292	12.7599
DW25	5528.56	2358.8	89.8863	24.74	Female	1	1	45	360	Other
DW26	4942.69	2227.3	88.4109	36.84	Male	1	1	21.4286	315	Other	0.434478	0.208245	0.301091	11.9918	4.782
DW28	6371.95	2433.8	87.5439	23.09	Female	1	1	38.5714	195	Black	0.13121	0.401719	0.47615	144.416	11.3117
DW29	4617.25	1976.4	70.4794	20.41	Female	1	1	0	195	White	0.155355	0.397483	0.459409	52.373	5.997
DW30	3913.41	1625.9	71.2218	21.5	Female	1	1	15	315	White	0.132858	0.442833	0.458419	43.7926	11.088
DW31	4734.31	1956.2	63.6791	16.85	Female	1	1	10.7143	195	Hispanic	0.155822	0.370786	0.476565	116.046	17.7587
DW32	5547.89	2476.4	84.3295	22.64	Female	1	1	102.857	195	Asian/Pacific Islander	0.112823	0.520934	0.384478	51.2787	17.016
DW33	4787.14	2274.9	78.8002	39.62	Male	1	1	102.857	195	Hispanic
DW34	5394.56	2207.7	86.5704	19.88	Female	1	2	55.7143	315	White	0.139072	0.421194	0.482154	71.7123	17.4319
DW35	3150.39	1882.7	70.9108	19.7	Female	1	2	45	75	White	0.108126	0.298398	0.603205	114.744	15.2273
DW37	4953.82	2199.8	86.7258	25.74	Female	1	2	38.5714	75	White	0.160447	0.376206	0.468243	20.9246	6.52604
DW40	4571.64	2434.6	87.0186	19.05	Female	1	2	10.7143	15	White	0.178111	0.255374	0.569836	65.2408	9.98775
DW41	5198.24	1984.2	80.3747	21.08	Female	1	2	72.8571	195	Hispanic	0.137833	0.290884	0.609812	106.335	26.6564
DW42	4304.06	2055.7	67.2101	28.3	Male	1	2	55.7143	315	Hispanic	0.147993	0.370552	0.502425	80.9063	8.71952
DW43	4478.1	2325.8	91.8223	18.06	Male	1	2	10.7143	315	Hispanic	0.170896	0.432096	0.384856	43.6623	3.5075
DW47	5722.65	2121.7	70.5625	22.36	Female	1	2	55.7143	75	Asian/Pacific Islander	0.161726	0.352373	0.492364	23.6844	3.83137
DW49	3912.84	1792	61.7708	25.01	Male	1	2	55.7143	360	White	0.107301	0.302555	0.604197	239.104	8.997
DW50	3685.94	1599.2	48.1339	21.66	Male	1	2	72.8571	15	White	0.132365	0.350818	0.533981	70.7606	11.8645
DW51	3608.7	1420.6	53.1274	29.82	Female	1	2	38.5714	315	Asian/Pacific Islander	0.16981	0.39471	0.437622	92.9629	11.5245
DW53	5975.03	2277.3	87.5432	19.57	Male	1	2	72.8571	75	Hispanic	0.336492	0.358837	0.295398	45.359	22.854
DW54	4676.56	1841.3	67.9325	20.27	Male	1	2	102.857	195	Asian/Pacific Islander	0.205948	0.482131	0.309085	7.8134	7.74267
DW55	2559.19	1166.3	35.5617	21.03	Female	1	2	27.8571	195	White	0.148875	0.353793	0.518401	47.0313	8.10913
DW56	4008.78	1935.4	73.9207	31.63	Male	1	2	32.1429	360	Asian/Pacific Islander	0.218319	0.43204	0.351885	22.3077	8.44192
DW57	3813.66	1782.4	60.6154	22.34	Female	1	2	32.1429	360	Hispanic	0.181236	0.296579	0.526566	28.5469	4.13994
DW58	3658.52	1539.3	48.9769	24.94	Female	1	2	15	195	Hispanic	0.162306	0.408983	0.419837	36.8367	11.422
DW59	4280.51	1701.9	62.5394	30.49	Male	1	2	38.5714	15	White	0.143314	0.297533	0.569636	132.755	7.30118
DW60	4410.72	1857.6	66.3909	21.35	Male	1	2	55.7143	315	White	0.259358	0.354901	0.378168	166.755	14.2481
DW63	4774.41	1756.4	61.4015	27.51	Female	1	2	55.7143	360	Black	0.128081	0.136082	0.735143	75.3725	11.0917
DW64	2940.4	1385.2	39.9924	18.59	Male	1	2	79.2857	75	Hispanic	0.232014	0.452974	0.312704	117.319	12.2979
DW65	5437.73	2005.5	63.6143	18.34	Female	1	2	10.7143	315	White	0.16831	0.396522	0.442456	134.141	19.2041
DW67	3794.95	1788.6	67.3504	20.87	Female	1	2	38.5714	360	Other	0.173263	0.410289	0.422458	79.502	13.0641
DW68	4432.94	1851	55.6797	23.83	Female	1	2	21.4286	315	Asian/Pacific Islander	0.141154	0.218015	0.687306	109.689	11.2701
DW70	3197.21	1424.2	51.5726	23.67	Female	1	2	15	315	Hispanic	0.125896	0.366193	0.515179	79.3494	9.46067
DW71	3476.83	1438.1	50.929	21.72	Female	1	2	10.7143	75	Hispanic	0.18321	0.399028	0.432551	56.0388	16.6009
DW72	3791.11	1501.5	53.7271	18.28	Female	1	2	45	315	Hispanic	0.15888	0.404686	0.43384	52.5173	5.01417
DW76	4921.45	2299.3	84.3509	22.09	Female	1	2	102.857	315	Black	0.124813	0.356777	0.5492	144.228	19.3691
DW77	3814.16	1658	52.1019	31.73	Male	1	2	21.4286	195	White	0.176895	0.311685	0.51643	93.9225	23.4913
DW78	3527.6	1538.9	54.8049	33.5	Male	1	2	102.857	360	White	0.222401	0.452821	0.330836	44.6402	7.56867
DW79	2440.77	1106.4	38.7857	50.37	Female	1	2	79.2857	360	Black	0.151647	0.405685	0.449086	50.1834	8.59193
DW80	4050.03	1784.4	62.4592	21.21	Female	1	2	55.7143	195	White	0.213624	0.390311	0.402881	50.2295	12.2583
DW81	5035.69	2031.7	66.9428	25.07	Male	1	2	102.857	195	Hispanic	0.170592	0.443808	0.394967	86.7649	15.9148
DW82	4796.12	1900.4	69.549	26.68	Male	1	2	102.857	360	White	0.144755	0.278001	0.584844	354.533	17.7188
DW83	5433.07	2253.8	87.8087	20.51	Female	1	2	38.5714	195	Hispanic	0.188766	0.277699	0.546649	49.7588	12.5296
DW84	3521.83	1728.2	50.1867	24.94	Female	1	2	27.8571	195	Hispanic	0.16767	0.235093	0.609232	122.777	20.1673
DW85	2947.69	1462.2	59.5047	28.4	Female	1	2	38.5714	315	Hispanic	0.144671	0.298466	0.567296	62.1696	5.69333
DW86	4515.26	2082.9	72.2686	20.72	Male	1	2	79.2857	195	Other	0.220741	0.530905	0.24375	27.4818	5.50845
DW87	4599.7	2106.8	82.5121	25.14	Male	1	2	49.2857	195	Black	0.170191	0.326232	0.506766	100.445	7.41346
DW89	5307.49	2573.7	97.7944	22.29	Male	1	2	55.7143	195	Other	0.101855	0.341706	0.558614	90.3015	6.22574
DW90	2009.42	962.6	29.7536	19.53	Female	1	2	55.7143	195	White	0.155237	0.299236	0.578238	65.7663	22.922
DW91	3431.06	2244.9	75.7205	25.07	Female	1	2	15	195	Hispanic	0.158535	0.291396	0.551771	62.1673	8.95163
DW92	4126.25	2401.6	97.5414	20.68	Female	1	2	102.857	195	White	0.176687	0.363237	0.487294	104.806	21.9466
DW94	3656.26	1616.1	54.2681	24.94	Female	1	2	102.857	195	White	0.19612	0.283358	0.538275	71.1431	8.56774
DW95	3691.31	2134.9	69.376	25.88	Male	4	2	102.857	195	Hispanic	0.237222	0.322767	0.442496	52.57	13.6765
DW96	1909.08	1137.4	50.1023	20.13	Male	1	2	55.7143	360	White	0.168573	0.309298	0.507404	179.133	14.7324
DW97	3520.91	1557.1	64.3237	19.17	Male	1	2	55.7143	195	White	0.154676	0.327294	0.519367	122.317	11.2789
DW98	3334.04	1546	43.321	20.99	Male	1	2	96.4286	195	Asian/Pacific Islander	0.205756	0.340438	0.457479	50.2229	14.9142
DW99	2999.65	1508.6	54.0664	25.66	Female	1	2	4.28571	315	Hispanic	0.154331	0.388626	0.462769	94.5469	12.4514
DW100	2822.64	1504	41.4714	25.31	Female	1	2	21.4286	195	White	0.0938178	0.360631	0.567469	132.278	17.6252
DW101	4395.92	2099.5	78.7363	25.29	Male	1	2	102.857	75	Hispanic	0.30253	0.501212	0.18682	55.1253	9.59202
