# Supplementary material for: Diet, physical activity and screen time but not body mass index are associated with the gut microbiome of a diverse cohort of college students living in university housing: a cross-sectional study
Source: BMC Microbiol. 2018 Dec 12;18:210. doi: 10.1186/s12866-018-1362-x (PMC6291939; doi:10.1186/s12866-018-1362-x)
Supplement: Supplementary file 4 — Table showing taxonomic abundance data for all genera. (XLSX 113 kb) [file 12866_2018_1362_MOESM4_ESM.xlsx]

## Sheet: Gut Microbial Taxa Abundance Da
# Constructed from biom file
#OTU ID						DW14	DW64	DW101	DW16	DW29	DW84	DW58	DW49	DW02	DW17	DW41	DW82	DW15	DW25	DW90	DW34	DW97	DW13	DW77	DW37	DW72	DW81	DW26	DW12	DW40	DW50	DW59	DW67	DW85	DW71	DW65	DW07	DW56	DW03	DW05	DW42	DW53	DW89	DW91	DW43	DW20	DW24	DW28	DW31
Unassigned	Other	Other	Other	Other	Other	0.00106934	0.00056281	0.000900495	0.000956776	0.00106934	0.000956776	0.00056281	0.000787933	0.000506529	0.0020824	0.00174471	0.00163215	0.00157587	0.00106934	0.000281405	0.00106934	0.000506529	0.000393967	0.000337686	0.00168843	0.000225124	0.000787933	0.000731652	0.000506529	0.00157587	0.000619091	0.000844214	0.000675371	0.00106934	0.000619091	0.00056281	0.00979289	0.00303917	0.000506529	0.00123818	0.000956776	0.00861099	0.00151959	0.00309545	0.00275777	0.00056281	0.030054	0.000619091	0.000900495
k__Archaea	p__Euryarchaeota	c__Methanobacteria	o__Methanobacteriales	f__Methanobacteriaceae	g__Methanobacterium	0	0	0	0	0	0	0	0	0	0	0	0	0	0	0	0	0	0	0	0	0	0	0	0	0	0	0	0	0	0	0	0	0	0	0	0	0	0	0	0	0	0	0	0
k__Archaea	p__Euryarchaeota	c__Methanobacteria	o__Methanobacteriales	f__Methanobacteriaceae	g__Methanobrevibacter	0	0	0	0.00185727	0	0	0	0	0.00512157	0.0020824	0.00101306	0	0.000168843	0.00647231	0	0	0.00129446	0	0	0.011819	0	0	0	0.00574066	0	0	0	0	0	0	0	0	0	0.000393967	0	0	0.0014633	0.00495272	0	0	0	0.0146893	0.00292661	0
k__Archaea	p__Euryarchaeota	c__Methanobacteria	o__Methanobacteriales	f__Methanobacteriaceae	g__Methanosphaera	0	0	0	0	0	0	0	0	0	0.000450248	0	0	0	0	0	0	0.000225124	0	0	0	0	0	0	0	0	0	0	0	0	0	0	0	0	0	0	0	0	0	0	0	0	0	0	0
k__Bacteria	p__Acidobacteria	c__iii1-8	o__SJA-36	f__	g__(Acidobacteria)	0	0	0	0	0	0	0	0	0	0	0	0	0	0	0	0	0	0	0	0	0	0	0	0	0	0	0	0	0	0	0	0	0	0	0	0	0	0	0	0	0	0	0	0
k__Bacteria	p__Actinobacteria	c__Acidimicrobiia	o__Acidimicrobiales	f__	g__(Acidomicrobiales)	0	0	0	0	0	0	0	0	0	0	0	0	0	0	0	0	0	0	0	0	0	0	0	0	0	0	0	0	0	0	0	0	0	0	0	0	0	0	0	0	0	0	0	0
k__Bacteria	p__Actinobacteria	c__Actinobacteria	o__Actinomycetales	f__	g__(Actinomycetales)	0	0	0	0	0	0	0	0	0	0	0	0	0	0	0	0	0	0	0	0	0	0	0	0	0	0	0	0	0	0	0	0	0	0	0	0	0	5.6281e-05	0	0	0	0	0	0
k__Bacteria	p__Actinobacteria	c__Actinobacteria	o__Actinomycetales	f__Actinomycetaceae	g__Actinomyces	0	0	0	0	0	0	0	5.6281e-05	0	0	0	0	0	0	0	0.000506529	0	0.000112562	5.6281e-05	0.000112562	0.000112562	0	5.6281e-05	0	0.000112562	0	5.6281e-05	0	0.000168843	0.000168843	0	0	0	0.000112562	0	5.6281e-05	5.6281e-05	0	0	0	0.000112562	0	5.6281e-05	5.6281e-05
k__Bacteria	p__Actinobacteria	c__Actinobacteria	o__Actinomycetales	f__Actinomycetaceae	g__Mobiluncus	0	0	0	0	0	0	0	0	0	0	0	0	0	0	0	0.000112562	0	0	0	0	0	0	0	0	0	0	0	0	0	0	0	0	0	0	0	0	0	0	0	0	0	0	0	0
k__Bacteria	p__Actinobacteria	c__Actinobacteria	o__Actinomycetales	f__Actinomycetaceae	g__Varibaculum	0	0	0	0	0	0	0	0	0	0	0	0	0	0	0	0.00056281	0	0.000112562	0	0	0	0	5.6281e-05	0	0	0.000112562	0	0	0	0	0	0	0	0	0	0	0	0	0	0	0	5.6281e-05	0	5.6281e-05
k__Bacteria	p__Actinobacteria	c__Actinobacteria	o__Actinomycetales	f__Brevibacteriaceae	g__Brevibacterium	0	0	0	0	0	0	0	0	0	0	0	0	0	0	0	0	0	0	0	0	0	0	0	0	0	0	0	0	0	0	0	0	0	0	0	0	0	5.6281e-05	0	0	0	0	0	0
k__Bacteria	p__Actinobacteria	c__Actinobacteria	o__Actinomycetales	f__Cellulomonadaceae	g__Cellulomonas	0	0	0	0	0	0	0	0	0	0	0	0	0	0	0	0	0	0	0	0	0	0	0	0	0	0	0	0	0	0	0	0	0	0	0	0	0	0	0	0	0	0	0	0
k__Bacteria	p__Actinobacteria	c__Actinobacteria	o__Actinomycetales	f__Corynebacteriaceae	g__Corynebacterium	0	0	0	0	0	0	0	0	0	0	0	0	0	0	0	5.6281e-05	0	0	0.000225124	0	5.6281e-05	0	0	0	0.0023638	0	0	0.000112562	0	0	0	5.6281e-05	0.000506529	5.6281e-05	0	0.00112562	0	0.000281405	0	0	0	0	0	0
k__Bacteria	p__Actinobacteria	c__Actinobacteria	o__Actinomycetales	f__Intrasporangiaceae	g__(Intrasporangiaceae)	0	0	0	0	0	0	0	0	0	0	0	0	0	0	0	0	0	0	0	0	0	0	0	0	0	0	0	0	0	0	0	0	0	0	0	0	0	0	0	0	0	0	0	0
k__Bacteria	p__Actinobacteria	c__Actinobacteria	o__Actinomycetales	f__Microbacteriaceae	g__Microbacterium	0	0	0	0	0	0	0	0	0	0	0	0	0	0	0	0	0	0	0	0	0	0	0	0	0	0	0	0	0	0	0	0	0	0	0	0	0	0	0	0.000393967	0	0	0	0
k__Bacteria	p__Actinobacteria	c__Actinobacteria	o__Actinomycetales	f__Micrococcaceae	g__Micrococcus	0.000281405	0	0	0	0	0	0	0	0	0	0	0	0	0	0	0	0	0	0	0	0	0	0	0	0	0	0	0	0	0	0	0	0	0	0	0	0	0	0	0	0	0	0	0
k__Bacteria	p__Actinobacteria	c__Actinobacteria	o__Actinomycetales	f__Micrococcaceae	g__Nesterenkonia	0	0	0	0	0	0	0	0	0	0	0	0	0	0	0	0	0	0	0	0	0	0	0	0	0	0	0	0	0	0	0	0	0	0	0	0	0	0	0	0	0	0.000506529	0	0
k__Bacteria	p__Actinobacteria	c__Actinobacteria	o__Actinomycetales	f__Micrococcaceae	g__Rothia	0	0	5.6281e-05	5.6281e-05	0	5.6281e-05	0	0	0	5.6281e-05	5.6281e-05	0	0	0	0	0	0	0	0	0	0.000112562	0	0	0	0	0	0	5.6281e-05	0	0	0	0	0	0	5.6281e-05	0	5.6281e-05	0	0	0.000393967	5.6281e-05	0	0	0
k__Bacteria	p__Actinobacteria	c__Actinobacteria	o__Actinomycetales	f__Nocardioidaceae	g__(Nocardioidaceae)	0	0	0	0	0	0	0	0	0	0	0	0	0	0	0	0	0	0	0	0	0	0	0	0	0	0	0	0	0	0	0	0	0	0	0	0	0	0	0	0	0	0	0	0
k__Bacteria	p__Actinobacteria	c__Actinobacteria	o__Actinomycetales	f__Yaniellaceae	g__Yaniella	0	0	0	0	0	0	0	0	0	0	0	0	0	0	0	0	0	0	0	0	0	0	0	0	0	0	0	0	0	0	0	0	0	0	0	0	0	0	0	0	0	0	0	0
k__Bacteria	p__Actinobacteria	c__Actinobacteria	o__Bifidobacteriales	f__Bifidobacteriaceae	Other Bifidobacteriaceae	0	0	0	0	0	0	0	0	0	0	0	0	0	0	0	0	0	0	0	0	0	0	0	0	0	0	0	5.6281e-05	0	0	0	0	0	0	0	0	0	0	0	0	0	0	0	0
k__Bacteria	p__Actinobacteria	c__Actinobacteria	o__Bifidobacteriales	f__Bifidobacteriaceae	g__Bifidobacterium	0.00889239	5.6281e-05	0.0276902	0.0129446	0.000450248	0.000506529	0.0101869	0	0.00438991	0.0102431	5.6281e-05	0.00360198	0.00658487	0.000168843	0.000393967	0.0223435	0.000619091	0	0	0.00427735	0.000506529	0.00979289	0.0178411	0.0196983	0.0091738	0	0.0102994	0.00928636	0.00320801	0	0.000506529	0.0197546	0.00303917	0.00720396	0.00438991	0.0154773	0.0011819	0.0225124	0.00151959	0.00360198	0.000506529	0	0.018629	0.0044462
k__Bacteria	p__Actinobacteria	c__Actinobacteria	o__Bifidobacteriales	f__Bifidobacteriaceae	g__Scardovia	0	0	0	0	0	0	0	0	0	0	0	0	0	0	0	0	0	0	0	0	0	0	0	0	0	0	0	0	0	0	0	0	0	0	0	0	5.6281e-05	0	0	0	0	0	5.6281e-05	0
k__Bacteria	p__Actinobacteria	c__Coriobacteriia	o__Coriobacteriales	f__Coriobacteriaceae	g__(Coriobacteriaceae)	0.000281405	0	0.000731652	0.00275777	0.000225124	0	0.000619091	0	0.000281405	0.000450248	5.6281e-05	5.6281e-05	0.000393967	0.000900495	5.6281e-05	0.0014633	0.000450248	0.00056281	0	0.000281405	0	0	0.00056281	0.000225124	0.000225124	0	0	0.000844214	0	0.000112562	0	0.000337686	5.6281e-05	0.000112562	5.6281e-05	0	0.000337686	0.00281405	0.000112562	0	5.6281e-05	0.00163215	0.00056281	0.000112562
k__Bacteria	p__Actinobacteria	c__Coriobacteriia	o__Coriobacteriales	f__Coriobacteriaceae	g__Adlercreutzia	5.6281e-05	0	0.000225124	0.000675371	0	0	0	0	0	5.6281e-05	0.000112562	0	0.000112562	0.000450248	0	0	0	0.000281405	0	0	0.000337686	0.000168843	0.000281405	0.000450248	0	0	0	0	0	0.000112562	0	0	0	0.000112562	0	5.6281e-05	0	5.6281e-05	0	0	5.6281e-05	0.000619091	0.000112562	0
k__Bacteria	p__Actinobacteria	c__Coriobacteriia	o__Coriobacteriales	f__Coriobacteriaceae	g__Atopobium	0	0	0	0	0	0.000112562	0.000112562	0	0	0	0	0	0	0	0	0.000112562	5.6281e-05	0	0	0	0	0	0	0	0	0	0	0	0	0	0	0	0	0	0	0	0	0	0	0	0	0	0	0
k__Bacteria	p__Actinobacteria	c__Coriobacteriia	o__Coriobacteriales	f__Coriobacteriaceae	g__Collinsella	0.000337686	0	0	0	0	0	5.6281e-05	0	5.6281e-05	0	0	0.000168843	0	0	0	0.000168843	5.6281e-05	5.6281e-05	0	0	0	0	0.000281405	0	0	0	0.000506529	0	0	0.000112562	0	0	0	0.000225124	0	0	0.000112562	0.00101306	0	0	5.6281e-05	0.000450248	0.00135074	0
k__Bacteria	p__Actinobacteria	c__Coriobacteriia	o__Coriobacteriales	f__Coriobacteriaceae	g__Eggerthella	0	0	0	0.000225124	0	0	0	0.000168843	0	0	0	0.000112562	0	0	5.6281e-05	0.000168843	0	5.6281e-05	0.000168843	0	0	0	0	0	0.000112562	0.000337686	0.000281405	0.000112562	0.000225124	0	0	0	0	0.000225124	0	0	0	0	0	0	0	0	0	0.000337686
k__Bacteria	p__Actinobacteria	c__Coriobacteriia	o__Coriobacteriales	f__Coriobacteriaceae	g__Slackia	0	0	0	0	0	0	0	0	0	0.000112562	0	0	0	0.000112562	0	0.00219496	0	0	0	0.000112562	0	0	0	0	0	0	0	0	0	0	0	0	0	5.6281e-05	0	0	0	0.000112562	0	0	0	0	5.6281e-05	0
k__Bacteria	p__Actinobacteria	c__Thermoleophilia	o__Gaiellales	f__	g__(Gaiellales)	0	0	0	0	0	0	0	0	0	0	0	0	0	0	0	0	0	0	0	0	0	0	0	0	0	0	0	0	0	0	0	0	0	0	0	0	0	0	0	0	0	0	0	0
k__Bacteria	p__Bacteroidetes	c__Bacteroidia	o__Bacteroidales	Other	Other Bacteroidales	0	0	0	0.000168843	0	0	0	0	0	0	0.000281405	0	0.000337686	0.000393967	5.6281e-05	0	5.6281e-05	0	0	0.000281405	0	0	0.000225124	0	0.000337686	0	5.6281e-05	0.000225124	0	0	0	0.000619091	5.6281e-05	0	0.000225124	0	5.6281e-05	5.6281e-05	0.000393967	0.000112562	0	0.000787933	0.000337686	0
k__Bacteria	p__Bacteroidetes	c__Bacteroidia	o__Bacteroidales	f__	g__(Bacteroidales)	0	0	0	5.6281e-05	0	0	0	0	0.00258892	0.0731652	0	0	0	0	0	0	5.6281e-05	5.6281e-05	0	0	0	0	0	0	0	0	0	0	0	0	0	0	0	0.000112562	0	0	0	0.0047276	0	0	5.6281e-05	0	0	0
k__Bacteria	p__Bacteroidetes	c__Bacteroidia	o__Bacteroidales	f__Bacteroidaceae	g__(Bacteroidaceae)	0	0	0	0	0	0	0	0	0	0	0	0	0	0	0	0	0	0	0	0	0	0	0	0	0	0	0	0	0	0	0	0	0	0	0	0	0	0	0	0	0	0	0	0
k__Bacteria	p__Bacteroidetes	c__Bacteroidia	o__Bacteroidales	f__Bacteroidaceae	g__Bacteroides	0.323953	0.621736	0.333183	0.621229	0.558757	0.478782	0.217244	0.467751	0.0747411	0.136256	0.0686628	0.227882	0.362224	0.156911	0.656236	0.347929	0.0131697	0.390252	0.243865	0.235761	0.675709	0.416704	0.221747	0.329863	0.279829	0.65224	0.426159	0.557407	0.7155	0.602206	0.733285	0.0804255	0.404379	0.242571	0.150439	0.539228	0.376182	0.17312	0.532924	0.208802	0.512607	0.247299	0.175653	0.599955
k__Bacteria	p__Bacteroidetes	c__Bacteroidia	o__Bacteroidales	f__Marinilabiaceae	g__(Mirinilabiaceae)	0	0	0	0	0	0	0	0	0	0	0	0	0	0	0	0	0	0	0	0	0	0	0	0	0	0	0	0	0	0	0	0	0	0	0	0	0	0	0	0	0	0	0	0
k__Bacteria	p__Bacteroidetes	c__Bacteroidia	o__Bacteroidales	f__Porphyromonadaceae	Other Porphyromonadaceae	0	0	0	0	0	0	0	0	0	0	0	0	0	0	0	0	0	0	0	0	0	0	0	0	0	0	0	0	0	0	0	0	0	0	0	0	0	0	0	0	0	0.000112562	0	0
k__Bacteria	p__Bacteroidetes	c__Bacteroidia	o__Bacteroidales	f__Porphyromonadaceae	g__(Poryphyrononadaceae)	0	0	0	0	0	0	0	0	0	0	0	0	0	0	0	0	0	0	0	0	0	0	0	0	0	0	0	0	0	0	0	0	0	0	0	0	0	0	0	0	5.6281e-05	0	0	0
k__Bacteria	p__Bacteroidetes	c__Bacteroidia	o__Bacteroidales	f__Porphyromonadaceae	g__Dysgonomonas	0	0	0	0	0	0	0	0	0	0	0	0	0	0	0.00129446	0	0	0	0	0	0	0	0	0	0	0	0	0	0	0	0	0	0	0	0	0	0	0	0	0	0	0	0	0
k__Bacteria	p__Bacteroidetes	c__Bacteroidia	o__Bacteroidales	f__Porphyromonadaceae	g__Paludibacter	0	0	0	0	0	0	0	0	0	0	0	0	0	0	0	0	0	0	0	0	0	0	0	0	0	0	0	0	0	0	0	0	0	0	0	0	0	0	0	0	0	0	0	0
k__Bacteria	p__Bacteroidetes	c__Bacteroidia	o__Bacteroidales	f__Porphyromonadaceae	g__Parabacteroides	0.0157024	0	0.035063	0.00545925	0.00433363	0.0104683	0.00337686	5.6281e-05	0.0112562	0.0193606	0.0149145	0.0488519	0.0140702	0.0550991	0.091738	0.0260581	0.00889239	0	0.214543	0.0226249	0.00574066	0.0110311	0.0161526	0.0303917	0.00979289	0.0674809	0.0383836	0.0220621	0.0231878	0.000393967	0.0568438	0.0467132	0.0125507	0.031855	0.00681	0.00579694	0.0558307	0.0185727	0.0357384	0.0122692	0.032249	0.0519473	0.00759793	0.0094552
k__Bacteria	p__Bacteroidetes	c__Bacteroidia	o__Bacteroidales	f__Porphyromonadaceae	g__Porphyromonas	0	0	0	5.6281e-05	0	0	0	0	0	0	0	0.000168843	0	5.6281e-05	0	0.00163215	0	0	0.000337686	0.000112562	0	5.6281e-05	0	5.6281e-05	0.000168843	0.000168843	0.000225124	0.00844214	0.000112562	0.000168843	0.000168843	5.6281e-05	5.6281e-05	0	0	0	0	5.6281e-05	0	0	0	0	0	0
k__Bacteria	p__Bacteroidetes	c__Bacteroidia	o__Bacteroidales	f__Prevotellaceae	g__Prevotella	0.000112562	0	0	0.00151959	5.6281e-05	0	0.000112562	0.0020824	0.42025	0.0944394	0.442593	0.289791	0.00315173	0.101812	0	0.018629	0.596803	0	0.212461	0.0289847	5.6281e-05	0	0.0298289	0.000281405	0.000168843	0.000675371	0.000281405	0.000450248	0.0020824	5.6281e-05	0.000506529	0.27921	0.268235	0.0126069	0.475743	5.6281e-05	5.6281e-05	0.0116502	0	0.396724	5.6281e-05	5.6281e-05	0.0548176	5.6281e-05
k__Bacteria	p__Bacteroidetes	c__Bacteroidia	o__Bacteroidales	f__RF16	g__ (Bacteroidales)	0	0	0	0	0	0	0	0	0	0	0	0	0	0	0	0	0	0	0	0	0	0	0	0	0	0	0	0	0	0	0	0	0	0	0	0	0	0	0	0	0	0	0	0
k__Bacteria	p__Bacteroidetes	c__Bacteroidia	o__Bacteroidales	f__Rikenellaceae	Other	0	0	0	0	0	0	0	0	0	5.6281e-05	0	0	0	0	0	0	0	0	0	5.6281e-05	0	0	0	0.000956776	0	0	5.6281e-05	5.6281e-05	0	0	0	0	0	0	0	0	0	0.00225124	0	0	0	0.000168843	0	0
k__Bacteria	p__Bacteroidetes	c__Bacteroidia	o__Bacteroidales	f__Rikenellaceae	g__(Rikenellaceae)	0.024032	0	0.00681	0.0718145	0.0184602	0.000112562	0	0.00686628	0.00106934	0.0131697	0.00675371	0.00574066	0.0200923	0.012213	0.00163215	0.0132823	0.00309545	0.031855	0.00388339	0.035457	0.00641603	0.0154773	0.0906686	0.0306168	0.0110311	0	0.0770486	0.059489	0.00821702	0.0733341	0.0079919	0.0197546	0.00968032	0.0079919	0.00129446	0.00658487	0.0329244	0.0148582	0.0220621	0.0189667	0.00343314	0.155448	0.00939892	0.0107497
k__Bacteria	p__Bacteroidetes	c__Bacteroidia	o__Bacteroidales	f__Rikenellaceae	g__Alistipes	0	0	0	0	0	0	0	0	0	0.000168843	0.000112562	0	0	0	0	0	0	0	0	0	0	0	0	0	0	0	0	0	0	0	0	0	0	0	0	0	0	0	0	0	0	0	0	0
k__Bacteria	p__Bacteroidetes	c__Bacteroidia	o__Bacteroidales	f__Rikenellaceae	g__Blvii28	0	0	0	0	0	0	0	0	0	0	0	0	0	0	0	0	0	0	0	0	0	0	0	0	0	0	0	0	0	0	0	0	0	0	0	0	0	0	0	0	0	0	0	0
k__Bacteria	p__Bacteroidetes	c__Bacteroidia	o__Bacteroidales	f__S24-7	g__(Bacteroidales)	0	0	0	0	0	0	0	0	0	0.0159275	0	0	0	0	0	0.00270149	0	0	0	0.000450248	0	0	0	0	0	0	0	0.000168843	0	0	0	0	0	0	0	0	0	0	0	0	0	0	0	0.0345002
k__Bacteria	p__Bacteroidetes	c__Bacteroidia	o__Bacteroidales	f__[Barnesiellaceae]	g__(Barnesiellaceae)	0	0	0	0.0374831	0.0199235	0.000112562	0.000675371	0	0.00112562	0.000619091	0.00506529	0	0.0397344	0.0459815	0	0.0195858	0.0023638	0	0	0.0593764	0.00056281	0	0	0	0.0465443	0	0	0.0347253	0.00450248	0	0.00810446	0.0384962	0.0265083	0	0.0023638	0.0044462	0.0223435	0.014014	0.0173345	0	0.00427735	5.6281e-05	0.0109185	0
k__Bacteria	p__Bacteroidetes	c__Bacteroidia	o__Bacteroidales	f__[Odoribacteraceae]	g__Butyricimonas	0.00315173	0	0.00393967	0.00303917	0	0	5.6281e-05	0	5.6281e-05	0.00574066	0.00101306	0	0.000168843	0.00275777	0	0.0214993	0.000506529	0	0	0.00742909	0	0.00213868	0	0	0.00129446	0	0.00962404	0.0112562	0	0	0.00106934	0.00551553	0.0149145	0	0.000393967	0	0.00545925	0.00174471	0	0.000393967	0	0.00484016	0.0014633	0
k__Bacteria	p__Bacteroidetes	c__Bacteroidia	o__Bacteroidales	f__[Odoribacteraceae]	g__Odoribacter	0.00984917	0	0.00112562	0.00787933	0.000450248	0	0	0	0.00056281	0.0014633	0.00163215	0.00315173	0.00320801	0.00348942	0	0.00635975	0.000112562	5.6281e-05	0.00157587	0.00253264	0.00348942	0	0.00996173	0.00658487	0.0023638	0	0.00427735	0.0131697	0.00219496	0	0.00213868	0.00540297	0	0	0.000844214	0.00112562	0.00292661	0.00298289	0.00416479	0.000450248	0.00191355	0.00180099	0.00574066	0.000900495
k__Bacteria	p__Bacteroidetes	c__Bacteroidia	o__Bacteroidales	f__[Paraprevotellaceae]	g__(Paraprevotellaceae)	0	0	0	0	0	0	0	0	0.0079919	0	0	0	0	0	0	0	0.00393967	0	0	0	0	0	0	0	0	0	0	0	0	0	0	0	0	0.000337686	0	0	0	0	0	0	0	0	0	0
k__Bacteria	p__Bacteroidetes	c__Bacteroidia	o__Bacteroidales	f__[Paraprevotellaceae]	g__Paraprevotella	0	0	0.0124381	0	0	0	0.00568438	0	0.0145768	0.0023638	0.00861099	0	0	0	0	0.000281405	0.0011819	0	0	0	0	0	0	0	0	0	0.014014	0.00489644	0	0	0	0.00714768	0	0.000450248	0.00962404	0	0	0.00196983	0	0	0	0	0	0
k__Bacteria	p__Bacteroidetes	c__Bacteroidia	o__Bacteroidales	f__[Paraprevotellaceae]	g__[Prevotella]	0	0	0	0	0	0	0	0	0	0	0.0605583	0	0	0	0	0.00720396	0.0824516	0	0	0	0	0	0	0	0	0	0	0	0	0	0	0.00968032	0	0	0	0	0	0	0	0	0	0	0	0
k__Bacteria	p__Bacteroidetes	c__Bacteroidia	o__Bacteroidales	f__p-2534-18B5	g__(Bacteroidales)	0	0	0	0	0	0	0	0	0	0	0	0	0	0	0	0	0	0	0	0	0	0	0	0	0	0	0	0	0	0	0	0	0	0	0	0	0	0	0	0	0	0	0	0
k__Bacteria	p__Bacteroidetes	c__Cytophagia	o__Cytophagales	f__Cytophagaceae	g__(Cythophagaceae)	0	0	0	0	0	0	0	0	0	0	0	0	0	0	0	0	0	0	0	0	0	0	0	0	0	0	0	5.6281e-05	0	0	0	0	0	0	0	0	0	0	0	0	0	0	0	0
k__Bacteria	p__Bacteroidetes	c__Flavobacteriia	o__Flavobacteriales	f__Cryomorphaceae	g__Fluviicola	0	0	0	0	0	0	0	0	0	0	0	0	0	0	0	0	0	0	0	0	0	0	0	0	0	0	0	0	0	0	0	0	0	0	0	0	0	0	0	0	0	0	0	0
k__Bacteria	p__Bacteroidetes	c__Flavobacteriia	o__Flavobacteriales	f__Flavobacteriaceae	g__(Flavobacteriaceae)	0	0	0	0	0	0	0	0	0	0	0	0	0	0	0	0	0	0	0	0	0	0	0	0	0	0	0	0	0	0	0	0	0	0	0	0	0	0	0	0	0	0	0	0
k__Bacteria	p__Bacteroidetes	c__Sphingobacteriia	o__Sphingobacteriales	f__	g__(Sphyngobacteriales)	0	0	0	0	0	0	0	0	0	0	0	0	0	0	0	0	5.6281e-05	0	0	0	0	0	0	0	0	0	0	0	0	0	0	0	0	0	0	0	0	0	0	0	0	0	0	0
k__Bacteria	p__Bacteroidetes	c__Sphingobacteriia	o__Sphingobacteriales	f__Sphingobacteriaceae	g__Pedobacter	0	0	0	0	0	0	0	0	0	0	0	0	0	0	0	0	0	0	0	0	0	0	0	0	0	0	0	0	0	0	0	0	0	0	0	0	0	0	0	0	0	0	0	0
k__Bacteria	p__Caldiserica	c__TTA-B1	o__	f__	g__(Cadiserica)	0	0	0	0	0	0	0	0	0	0	0	0	0	0	0	0	0	0	0	0	0	0	0	0	0	0	0	0	0	0	0	0	0	0	0	0	0	0	0	0	0	0	0	0
k__Bacteria	p__Chloroflexi	c__Anaerolineae	o__	f__	g__(Chloroflexi)	0	0	0	0	0	0	0	0	0	0	0	0	0	0	0	0	0	0	0	0	0	0	0	0	0	0	0	0	0	0	0	0	0	0	0	0	0	0	0	0	0	0	0	0
k__Bacteria	p__Chloroflexi	c__Anaerolineae	o__Anaerolineales	f__Anaerolinaceae	Other	0	0	0	0	0	0	0	0	0	0	0	0	0	0	0	0	0	0	0	0	0	0	0	0	0	0	0	0	0	0	0	0	0	0	0	0	0	0	0	0	0	0	0	0
k__Bacteria	p__Chloroflexi	c__Anaerolineae	o__Anaerolineales	f__Anaerolinaceae	g__(Anaerolinaceae)	0	0	0	0	0	0	0	0	0	0	0	0	0	0	0	0	0	0	0	0	0	0	0	0	0	0	0	0	0	0	0	0	0	0	0	0	0	0	0	0	0	0	0	0
k__Bacteria	p__Chloroflexi	c__Anaerolineae	o__Anaerolineales	f__Anaerolinaceae	g__C1_B004	0	0	0	0	0	0	0	0	0	0	0	0	0	0	0	0	0	0	0	0	0	0	0	0	0	0	0	0	0	0	0	0	0	0	0	0	0	0	0	0	0	0	0	0
k__Bacteria	p__Chloroflexi	c__Anaerolineae	o__Anaerolineales	f__Anaerolinaceae	g__SHD-231	0	0	0	0	0	0	0	0	0	0	0	0	0	0	0	0	0	0	0	0	0	0	0	0	0	0	0	0	0	0	0	0	0	0	0	0	0	0	0	0	0	0	0	0
k__Bacteria	p__Chloroflexi	c__Anaerolineae	o__Anaerolineales	f__Anaerolinaceae	g__T78	0	0	0	0	0	0	0	0	0	0	0	0	0	0	0	0	0	0	0	0	0	0	0	0	0	0	0	0	0	0	0	0	0	0	0	0	0	0	0	0	0.000112562	0	0	0
k__Bacteria	p__Chloroflexi	c__Anaerolineae	o__Anaerolineales	f__Anaerolinaceae	g__WCHB1-05	0	0	0	0	0	0	0	0	0	0	0	0	0	0	0	0	0	0	0	0	0	0	0	0	0	0	0	0	0	0	0	0	0	0	0	0	0	0	0	0	0	0	0	0
k__Bacteria	p__Chloroflexi	c__Anaerolineae	o__GCA004	f__	g__(Anaerolinae)	0	0	0	0	0	0	0	0	0	0	0	0	0	0	0	0	0	0	0	0	0	0	0	0	0	0	0	0	0	0	0	0	0	0	0	0	0	0	0	0	0	0	0	0
k__Bacteria	p__Chloroflexi	c__Anaerolineae	o__SBR1031	f__SHA-31	g__(Anaerolinae)	0	0	0	0	0	0	0	0	0	0	0	0	0	0	0	0	0	0	0	0	0	0	0	0	0	0	0	0	0	0	0	0	0	0	0	0	0	0	0	0	0	0	0	0
k__Bacteria	p__Chloroflexi	c__Dehalococcoidetes	o__Dehalococcoidales	f__Dehalococcoidaceae	g__Dehalococcoides	0	0	0	0	0	0	0	0	0	0	0	0	0	0	0	0	0	0	0	0	0	0	0	0	0	0	0	0	0	0	0	0	0	0	0	0	0	0	0	0	0	0	0	0
k__Bacteria	p__Cyanobacteria	c__4C0d-2	o__YS2	f__	g__(Cyanobacteria)	0	0	0	0	0	0	0	0	0	0	0.00540297	0	0	0	0	0	0.000619091	0	0	0	0	0	0.00540297	0	0	0	0	0	0	0	0	0	0	0	0	0	0	0	0.055493	0.000112562	0	0	0	0
k__Bacteria	p__Cyanobacteria	c__Chloroplast	o__Chlorophyta	f__Chlamydomonadaceae	Other Chlamydomonadaceae	0	0	0	0	0	0	0	0	0	0	0	0	0	0	0	0	0	0	0	0	0	0	0	0	0	0	0	0	0	0	0	0	0	0	0	0	0	0	0	0	0	0	0	0
k__Bacteria	p__Cyanobacteria	c__Chloroplast	o__Chlorophyta	f__Chlamydomonadaceae	g__Acutodesmus	0	0	0	0	0	0	0	0	0	0	0	0	0	0	0	0	0	0	0	0	0	0	0	0	0	0	0	0	0	0	0	0	0	0	0	0	0	0	0	0	0	0	0	0
k__Bacteria	p__Cyanobacteria	c__Chloroplast	o__Streptophyta	f__	g__(Streptohpyta)	0	0	0	0	0	0	0	0.00422107	0.000112562	0	0	0	5.6281e-05	0	0.000225124	0	0	5.6281e-05	0	0	0.000112562	0	0	0.000112562	0	0	0	0	0.000281405	0.000900495	0	0	0	0	0	0	0	0.000281405	0	0	0	0	0	0
k__Bacteria	p__Cyanobacteria	c__Oscillatoriophycideae	o__Oscillatoriales	f__Phormidiaceae	g__Phormidium	0	0	5.6281e-05	0	0	0	5.6281e-05	0	0	0	0	0	0	0	0	0	5.6281e-05	0	5.6281e-05	0.000112562	0	0	0	0	0.000225124	0	0	5.6281e-05	0	0	0	5.6281e-05	0	0	0	0	5.6281e-05	0.000168843	0	0.000112562	0	5.6281e-05	5.6281e-05	0
k__Bacteria	p__FBP	c__	o__	f__	g__(FBP)	0	0	0	0	5.6281e-05	0	0	0	0	0	0	0	0	0	0	0	0	0	0	0	0	0	0	0	0	0	0	0	0	0	0	0	0	0	0	0	0	0	0	0	0	0	0	0
k__Bacteria	p__Firmicutes	c__Bacilli	Other	Other	Other Firmicutes	0	0	0	0	0	0	0	0	0	0	0	0	0	0	0	0	0	0	0	0	0	0	0	0	0	0	0	0	0	0	0	0	0	0	0	0	0	0	0	0	0	0	0	0
k__Bacteria	p__Firmicutes	c__Bacilli	o__Bacillales	f__Alicyclobacillaceae	g__(Alicyclobacillaceae)	0	0	0	0	0	0	0	0	0	0	0	0	0	0	0	0	0	0	0	0	0	0	0	0	0	0	0	0	0	0	0	0	0	0	0	0	0	0	0	0	0	0	0	0
k__Bacteria	p__Firmicutes	c__Bacilli	o__Bacillales	f__Alicyclobacillaceae	g__Alicyclobacillus	0	0	0	0	0	0	0	0	0	0	0	0	0	0	0	0	0	0	0	0	0	0	0	0	0	0	0	0	0	0	0	0	0	0	0	0	0	0	0	0	0	0	0	0
k__Bacteria	p__Firmicutes	c__Bacilli	o__Bacillales	f__Bacillaceae	g__Anoxybacillus	0	0	0	0	0	0	0	0	5.6281e-05	0	0	0	0	0	0	0	0	0	0	0	0	0	5.6281e-05	0	0	0	0	0	0	0	0	0	0	0	0	0	0	5.6281e-05	0	0	0	0	0	0
k__Bacteria	p__Firmicutes	c__Bacilli	o__Bacillales	f__Bacillaceae	g__Bacillus	0	0	0	0	0	0	0	0	0	0	0	0	0	0	0	0	0	0	0	0	0	0	0	0	0	0	0	0	0	0	0	0.000112562	0	0	0	0	0	5.6281e-05	0	0	0	0	0	0
k__Bacteria	p__Firmicutes	c__Bacilli	o__Bacillales	f__Paenibacillaceae	g__Paenibacillus	0	0	0	0	0	0	0	0	0	0	0	0	0	0	0	0	0	0	0	0	0	0	0	0	0	0	0	0	0	0	0	0	0	0	0	0	0	0	0	0	0	0	0	0
k__Bacteria	p__Firmicutes	c__Bacilli	o__Bacillales	f__Planococcaceae	Other Planococcaceae	0	0	0	0	0	0	0	0	0	0	0	0	0	0	0	0	0	0	0	0	0	0	0	0	0	0	0	0	0	0	0	0	0	0	0	0	0	0	0	0	0	0	0	0
k__Bacteria	p__Firmicutes	c__Bacilli	o__Bacillales	f__Staphylococcaceae	g__Staphylococcus	0	5.6281e-05	5.6281e-05	0	0	0	0	0	0	0	0	0	0	5.6281e-05	0	0	0	0	0	5.6281e-05	0	0	0	0	0	0	0	0	0	0	0	0	0	0	0	0	0	0	0	0	0	0	0	0.000731652
k__Bacteria	p__Firmicutes	c__Bacilli	o__Bacillales	f__Thermoactinomycetaceae	g__(Thermoactinomycetaceae)	0	0	0	0	0	0	0	0	0	0	0	0	0	0	0	0	0	0	0	0	0	0	0	0	0	0	0	0	0	0	0	0	0	0	0	0	0	0	0	0	0	0	0	0
k__Bacteria	p__Firmicutes	c__Bacilli	o__Bacillales	f__Thermoactinomycetaceae	g__Planifilum	0	0	0	0	0	0	0	0	0	0	0	0	0	0	0	0	0	0	0	0	0	0	0	0	0	0	0	0	0	0	0	0	0	0	0	0	0	0	0	0	0	0	0	0
k__Bacteria	p__Firmicutes	c__Bacilli	o__Bacillales	f__[Exiguobacteraceae]	g__Exiguobacterium	0	0	0	0	0	0	0	0	0	0	0	0	0	0	0	0	0	0	0	0	0	0	0	0	0	0	0	0	0	0	0	0	0	0	0	0	0	0	0	0	0	0	0	0
k__Bacteria	p__Firmicutes	c__Bacilli	o__Gemellales	f__Gemellaceae	g__(Acidobacteria)	0	0.000225124	5.6281e-05	5.6281e-05	0	5.6281e-05	5.6281e-05	0	5.6281e-05	0	0	0	0	5.6281e-05	0	0	0	5.6281e-05	0	0	0	0	0	0	0	0	0	0	0	0	0	0	0	0	0	0	0	5.6281e-05	0	0	0.000112562	0	0	0
k__Bacteria	p__Firmicutes	c__Bacilli	o__Gemellales	f__Gemellaceae	g__Gemella	0	0	0	0	0	0	0	0	0	0	0	0	0	0	0	0	0	0	0	0	0	0	0	0	0	0	0	0	0	0	0	0	0	0	0	0	0	0	5.6281e-05	0	0	0	0	0
k__Bacteria	p__Firmicutes	c__Bacilli	o__Lactobacillales	Other	Other Lactobacillales	0	0	0	0	0	0	0	0	0	0	0	0	0	0	0	0	0	0	0	0	0	0	0	0	0	0	0	0	0	0	5.6281e-05	5.6281e-05	0.000112562	0	0	0.000112562	0	0	0	0	0	0	0	0
k__Bacteria	p__Firmicutes	c__Bacilli	o__Lactobacillales	f__	g__(Lactobacillales)	0	0	0	0	0	0	0.000619091	0	0	0	0	0	0	0	0	0	0	0	0	0	0	0	0	0	0	0	0	0	0	0	0	0	0	0	0	0	0	0	0	0	0	0	0	0
k__Bacteria	p__Firmicutes	c__Bacilli	o__Lactobacillales	f__Aerococcaceae	Other Aerococcaceae	0	0	0	0	0	0	5.6281e-05	0	0	0	0	0	0	0	0	5.6281e-05	0	0	5.6281e-05	0	0	0	0	0	0	0	0	0	0	0	0	0	0	0	0	0	0	0	0	0	0	0	0	0
k__Bacteria	p__Firmicutes	c__Bacilli	o__Lactobacillales	f__Aerococcaceae	g__Aerococcus	0	0	0	0	0	0	0	0	0	0	0	0	0	0.000168843	0	0	0	0	0	0	0	0	0	0	0	0	0	0	0	0	0	0	0	0	0	0	0	0	0	0	0	0	0	0
k__Bacteria	p__Firmicutes	c__Bacilli	o__Lactobacillales	f__Carnobacteriaceae	g__Granulicatella	0	0	0	0	0	0	0	0	0	0	0	0	0	0	0	0	0	0	0	0	0	0	0	0	0	0	5.6281e-05	0	0	0	0	0	0	0	0	0	0	0	0	0	0	0	0	0
k__Bacteria	p__Firmicutes	c__Bacilli	o__Lactobacillales	f__Enterococcaceae	Other Enterococcaceae	0	0	0	0	0	0	0	0	0	0	0	0	0	0	0	0	0	0	0	0	0	0	0	0	0	0	5.6281e-05	0	0	0	0	0	0	0	0	0	0	0	0	0	0	0	0	0
k__Bacteria	p__Firmicutes	c__Bacilli	o__Lactobacillales	f__Enterococcaceae	g__Enterococcus	0	0	0	0	0	0	0	0	0	0	0	0	0	0	0	0	0	0	0	0	0	0	0	0	0	0	0	0	0	0	0	5.6281e-05	0	0	0	0	0	0	0	0	0	0	0	0
k__Bacteria	p__Firmicutes	c__Bacilli	o__Lactobacillales	f__Lactobacillaceae	Other Lactobacillaceae	0	0	0	0	0	0	5.6281e-05	0	0	0	0	0	0	0	0	0	0	0	0	0	0	0	0	0	0	0	0	0	0	0	0	0	0	0	0	0	0	0	0	0	0	0	0	0
k__Bacteria	p__Firmicutes	c__Bacilli	o__Lactobacillales	f__Lactobacillaceae	g__Lactobacillus	0.000619091	0	0	5.6281e-05	0	0	5.6281e-05	0	5.6281e-05	0.0115939	5.6281e-05	0	0.000112562	5.6281e-05	0	0.0142391	0	0	0	0	0	0	0	0	0	0	0	0	0.000112562	0	0	0.00782305	0	0	0	0	0	0	0	0	0	0	0.000281405	0
k__Bacteria	p__Firmicutes	c__Bacilli	o__Lactobacillales	f__Lactobacillaceae	g__Pediococcus	0	0	0	0	5.6281e-05	0	0	0	0	0	0	0	0	0	0	0	0	0	0	0	0	0	0	0	0	0	0	0	0	0	0	0	0	0	0	0	0	0	0	0	0	0	0	0
k__Bacteria	p__Firmicutes	c__Bacilli	o__Lactobacillales	f__Leuconostocaceae	g__(Leuconostocaceae)	0	0	0	0	0	0	0	0	0	0	0	0	0	0	0	0	0	0	0	0	5.6281e-05	0	0.00495272	0	0	0	0	0	0	0	0	0	0	0	0	0	0	0	0	0	0	0	0	0
k__Bacteria	p__Firmicutes	c__Bacilli	o__Lactobacillales	f__Leuconostocaceae	g__Leuconostoc	0	0	0	0	0	0	0.000168843	0	0	0	0	0	0	0	0	0	0	0	0	0	0	0	5.6281e-05	0	0	0	0	0	0	0	0	0	0	0	0	0	0	0	0	0	0	0	0	0
k__Bacteria	p__Firmicutes	c__Bacilli	o__Lactobacillales	f__Streptococcaceae	g__Lactococcus	0	5.6281e-05	0	0.000225124	0	0	0.000450248	0	0	0	0	0	0	0.000168843	0	0	0	5.6281e-05	5.6281e-05	0	0	5.6281e-05	0	0	0	0	5.6281e-05	0	0	0.000168843	0	0	0	0	5.6281e-05	0	0	0	0	0	0	5.6281e-05	0.000281405	0.000619091
k__Bacteria	p__Firmicutes	c__Bacilli	o__Lactobacillales	f__Streptococcaceae	g__Streptococcus	0.000112562	0.000281405	0.00213868	0.00242008	0.000506529	0.0108622	0.00692256	0.00129446	0.000450248	0.000506529	0.00309545	0.000168843	0.00270149	0.00123818	0.000225124	0.00056281	0.000844214	0.00506529	0.00106934	5.6281e-05	0.014014	0.00242008	0.00151959	0.00123818	0.00405223	0.000337686	0.00112562	0.00523413	0.00275777	0.00196983	0.000450248	0.000225124	0.000337686	0.00287033	0.00056281	0.000619091	0.000281405	0.0014633	0.000337686	0.000619091	0.000281405	0.000337686	0.00500901	0.000731652
k__Bacteria	p__Firmicutes	c__Bacilli	o__Turicibacterales	f__Turicibacteraceae	g__Turicibacter	0.000675371	0	0.00157587	0.0020824	0.00056281	0	0.000168843	0.0131135	0.0014633	0	5.6281e-05	0.000168843	0.000112562	0.000337686	5.6281e-05	0.00101306	0.000281405	0	0.000225124	0.000281405	0.000619091	0.000450248	0	0.000450248	0.00056281	0	5.6281e-05	0.00742909	0	0.000281405	0.000506529	0.00242008	0.000506529	0.000337686	0	0.00123818	0	5.6281e-05	0	0	0	0	0.00337686	0.000281405
k__Bacteria	p__Firmicutes	c__Clostridia	Other	Other	Other Clostridia	0.000112562	0	0	0.000168843	0	0	0	0	0	0	0	0	0	0.000225124	0	0	0	0	0	0	0	0	0	0.000112562	0	0	0	0	0	0	0	0	0	0	0	0	0.000225124	0	0.000112562	0	0	0	0.000393967	0
k__Bacteria	p__Firmicutes	c__Clostridia	o__Clostridiales	Other	Other Clostridiales	0.00270149	0.0023638	0.00399595	0.00506529	0.0014633	0.00180099	0.00551553	0.00281405	0.00196983	0.00438991	0.00427735	0.00129446	0.00337686	0.01362	0.000168843	0.0011819	0.0020824	0.00427735	0.00163215	0.0176722	0.000450248	0.0035457	0.0103557	0.00923008	0.00287033	0.00123818	0.00180099	0.00196983	0.00168843	0.00180099	0.000619091	0.00523413	0.00135074	0.00793561	0.00123818	0.0023638	0.00332058	0.00962404	0.00320801	0.00360198	0.00247636	0.00371454	0.0453624	0.00253264
k__Bacteria	p__Firmicutes	c__Clostridia	o__Clostridiales	f__	g__(Clostridiales)	0.0488519	0.0865601	0.0856596	0.0113688	0.0352319	0.0472197	0.0505966	0.105245	0.0658487	0.0321927	0.0320801	0.0240882	0.133273	0.0498086	0.0014633	0.0267897	0.0462067	0.0786245	0.0280279	0.0339937	0.0133949	0.0719833	0.0503152	0.0402972	0.0951711	0.0431112	0.102094	0.0288158	0.0117064	0.0338811	0.00467132	0.0235254	0.0224561	0.165297	0.0215556	0.0614588	0.0375394	0.0579131	0.044068	0.0439554	0.125056	0.0588699	0.0841963	0.0948897
k__Bacteria	p__Firmicutes	c__Clostridia	o__Clostridiales	f__Caldicoprobacteraceae	g__Caldicoprobacter	0	0	0	0	0	0	0	0	0	0	0	5.6281e-05	0	0	0	0	0	0	0	5.6281e-05	0	0	0	0	0	0	0	0	0	0	0	0	0	0	0	0	0	0	0	0	0	0	0	0
k__Bacteria	p__Firmicutes	c__Clostridia	o__Clostridiales	f__Christensenellaceae	g__(Christensenellaceae)	0.000787933	0	0.000337686	0.00371454	0.000731652	0	0	0.000112562	0.00174471	0.00303917	0.000619091	0.000675371	0.00129446	0.0110311	0	0.00360198	0.000956776	0.000450248	0	0.0135074	0.000112562	0.000225124	0.0155335	0.0108059	0.00230752	0.00112562	0.000225124	0.000619091	0.000168843	0.000731652	0.000168843	0.00506529	0.00056281	0.000619091	0.000281405	0.000675371	0.0148019	0.00377082	0.00112562	0.00529041	5.6281e-05	0.00123818	0.014633	0.000112562
k__Bacteria	p__Firmicutes	c__Clostridia	o__Clostridiales	f__Christensenellaceae	g__Christensenella	0.000112562	0	0	5.6281e-05	0	0	0	0	0	0	0	5.6281e-05	0	0.000168843	0	0	5.6281e-05	0	0	0	0	5.6281e-05	5.6281e-05	0	0	0	0	0.000112562	0	0	0	5.6281e-05	0	0	0	0	0	0.000112562	0	0	0	0.000675371	0	0
k__Bacteria	p__Firmicutes	c__Clostridia	o__Clostridiales	f__Clostridiaceae	Other Clostridiaceae	0	0	0.000225124	0	0	0	0.00056281	0.000393967	5.6281e-05	5.6281e-05	0	5.6281e-05	0	0.000281405	0	0.000225124	5.6281e-05	0.000337686	0.000225124	0	0	0	5.6281e-05	0.000337686	0.000506529	0	0	0.000225124	0.000168843	0	0	0	0	0.000731652	0	0.000225124	0.000225124	0	0	0.000281405	5.6281e-05	0.000168843	5.6281e-05	0
k__Bacteria	p__Firmicutes	c__Clostridia	o__Clostridiales	f__Clostridiaceae	g__(Clostridiaceae)	0.000956776	0.000281405	0.000956776	0.000393967	0.00157587	0.000168843	0.0011819	0.0070914	0.00275777	0.000844214	5.6281e-05	0.000956776	0.000225124	0.000787933	0.00270149	0.00692256	0.000281405	0.00056281	0.00545925	0.000619091	0.00140702	0.000956776	0.00106934	0.00157587	0.00523413	0	5.6281e-05	0.00247636	0.00450248	0.00360198	5.6281e-05	0.00759793	0.00247636	0.00641603	0.000168843	0.000506529	0.00135074	0.000956776	0.000281405	0.0020824	0.000787933	0.000337686	0.0210491	0.0014633
k__Bacteria	p__Firmicutes	c__Clostridia	o__Clostridiales	f__Clostridiaceae	g__Caloramator	0	0	0	0	0	0	0	0	0	0	0	0	0	0	0	0	0	0	0	0	0	0	0	0	0	0	0	0	0	0	0	0	0	0	0	0	0	0	0	0	0	0	0	0
k__Bacteria	p__Firmicutes	c__Clostridia	o__Clostridiales	f__Clostridiaceae	g__Clostridium	0.000900495	0.000787933	0.00129446	0.00129446	0.00106934	0.00348942	0.000619091	0.000393967	0.0020824	0.000956776	0.00174471	0.00140702	0.00151959	0.010412	0	0.000675371	0.00157587	5.6281e-05	0.00163215	0.0073728	0.000337686	0.00168843	0.0173345	0.00365826	0.000337686	0.000450248	0.000337686	0.000281405	0.000844214	0.00123818	0.000225124	0.000337686	0.00129446	0.000337686	0.00185727	0.000619091	0.0247073	0.000956776	0.00101306	0.0035457	0.0011819	0	0.00309545	0.000450248
k__Bacteria	p__Firmicutes	c__Clostridia	o__Clostridiales	f__Clostridiaceae	g__SMB53	0.000112562	0	0.000168843	5.6281e-05	0	0	0.00056281	0.000168843	0.000112562	0.000112562	0	0	0	0.000393967	0	0	0	0.000225124	0.000112562	0	0	5.6281e-05	0	0	0	0	0	5.6281e-05	5.6281e-05	0	0	5.6281e-05	0	5.6281e-05	0	0	0.000168843	0	0	0	0	0.000450248	0	0
k__Bacteria	p__Firmicutes	c__Clostridia	o__Clostridiales	f__Dehalobacteriaceae	g__(Dehalobacteriaceae)	0	0	0	0	0	0	0	0	0	0	0	0	0	0	0	0	0	0	0	0	0	0	0.000112562	0	0	0	0	0	0	0	0	0	0	0	0	0	0	0	0	0	0	0	0	0
k__Bacteria	p__Firmicutes	c__Clostridia	o__Clostridiales	f__Dehalobacteriaceae	g__Dehalobacterium	0.000281405	0	0	5.6281e-05	5.6281e-05	0	0	0	0	5.6281e-05	0	0	0	0.000337686	0	5.6281e-05	5.6281e-05	5.6281e-05	0	0	0	0	0.000337686	0.000506529	5.6281e-05	0	0	0	0	0	0	5.6281e-05	0	0	5.6281e-05	0	0.000112562	0.000450248	5.6281e-05	5.6281e-05	0	0.000337686	0.000281405	0
k__Bacteria	p__Firmicutes	c__Clostridia	o__Clostridiales	f__EtOH8	g__(Clostridiales)	0.000225124	0	0	0	0	0	0	0	0	0	0.000168843	0	0	0	0	0	0	0	0	0	0	0	0.000281405	0	0	0	0	0	0	0	0	0	0	0	0	0	0	0	0	0	0	0.000506529	0	0
k__Bacteria	p__Firmicutes	c__Clostridia	o__Clostridiales	f__Eubacteriaceae	g__(Eubaccteriaceae)	0	0	0	0	0	0	0	0	0	0	0	0	0	0	0	0	0	0	0	0	0	0	0	0	0	0	0	0	0	0	0	0	5.6281e-05	0	0	0	0	0	0	0	0	0	0	0
k__Bacteria	p__Firmicutes	c__Clostridia	o__Clostridiales	f__Eubacteriaceae	g__Acetobacterium	0	0	0	0	0	0	0	5.6281e-05	0	5.6281e-05	0	5.6281e-05	0	0.000168843	0	0.000112562	0	0	0	0.000112562	0	0	0	0.000225124	0	0	0	0	5.6281e-05	5.6281e-05	5.6281e-05	5.6281e-05	0	0	0	0	0	5.6281e-05	0	5.6281e-05	0	0	0	0
k__Bacteria	p__Firmicutes	c__Clostridia	o__Clostridiales	f__Eubacteriaceae	g__Anaerofustis	0	0	0	0	0	0	0	0	0	0	0	0	0	0	0	0	0	0	0	0	0	0	0	0	0.000112562	0	0	0	0	0	0	0	0	0	0	0	0	0	0	0	0	0	0	0
k__Bacteria	p__Firmicutes	c__Clostridia	o__Clostridiales	f__Eubacteriaceae	g__Pseudoramibacter_Eubacterium	0	0	0	5.6281e-05	0	0	0	0	0	0	0	0	0	5.6281e-05	0	0	0	0	0	0.000337686	0	0	0	0.000112562	0	0	0	0	0	0.000112562	0	0	0	0	0	0	0	0	0	0	0	0	0	0
k__Bacteria	p__Firmicutes	c__Clostridia	o__Clostridiales	f__Gracilibacteraceae	Other (Gracilibacteraceae)	0	0	0	0	0	0	0	0	0	0	0	0	0	0	0	0	0	0	0	0	0	0	0	0	0	0	0	0	0	0	0	0	0	0	0	0	0	0	0	0	0	0	5.6281e-05	0
k__Bacteria	p__Firmicutes	c__Clostridia	o__Clostridiales	f__Lachnospiraceae	Other (Lachnospiraceae)	0.00692256	0.00810446	0.00883611	0.00191355	0.0108622	0.0123255	0.0044462	0.00613462	0.00714768	0.00281405	0.00782305	0.00337686	0.00506529	0.0102994	0.00365826	0.00275777	0.00393967	0.00579694	0.00793561	0.00568438	0.00545925	0.0141828	0.00438991	0.00517785	0.00703512	0.00332058	0.00388339	0.00410851	0.00281405	0.00534669	0.00658487	0.0032643	0.00225124	0.0108622	0.0032643	0.00450248	0.00140702	0.00928636	0.00534669	0.00348942	0.00832958	0.00365826	0.00641603	0.00782305
k__Bacteria	p__Firmicutes	c__Clostridia	o__Clostridiales	f__Lachnospiraceae	g__(Lachnospiraceae)	0.0493584	0.0943832	0.0540297	0.0119316	0.0330369	0.0509343	0.0731652	0.0570689	0.0586448	0.0130009	0.0412539	0.0380459	0.0417042	0.0239194	0.0675371	0.016434	0.0296038	0.04086	0.0332058	0.0213868	0.0559995	0.059095	0.0501463	0.0447996	0.0262269	0.0415353	0.0601643	0.0188541	0.0263395	0.0473886	0.0174471	0.0142954	0.0225124	0.0910626	0.0307294	0.0356821	0.0163215	0.0381022	0.0244259	0.014014	0.0534106	0.0204863	0.0393967	0.0371454
k__Bacteria	p__Firmicutes	c__Clostridia	o__Clostridiales	f__Lachnospiraceae	g__Anaerostipes	0.000337686	0.00106934	0.00337686	0.000393967	0.0020824	0	0	0.00123818	0.00410851	0.000281405	0.0011819	0.00506529	0.0023638	0.00056281	0	0.000168843	0.000731652	0.00123818	0	0.00281405	0.00157587	0.000450248	0.0011819	0.00140702	0.00506529	0	0.00135074	0.000675371	0.000393967	0.0014633	0.0059095	0.00056281	0	0.000956776	0.000619091	0.000787933	0.00287033	0.00129446	0.000900495	0.000168843	0.00686628	0.000675371	0	0.000337686
k__Bacteria	p__Firmicutes	c__Clostridia	o__Clostridiales	f__Lachnospiraceae	g__Blautia	0.0432238	0.0148019	0.0415916	0.00979289	0.0224561	0.01362	0.033262	0.0059095	0.0160964	0.00669743	0.0166029	0.0169406	0.0294912	0.0335997	0.0131135	0.032249	0.0148019	0.156405	0.0545362	0.00804818	0.00934264	0.0297726	0.0251576	0.0301103	0.0452499	0.0198109	0.0193044	0.0148582	0.0294912	0.0111436	0.00787933	0.00855471	0.0116502	0.0767109	0.0173908	0.0118753	0.00337686	0.0524538	0.00681	0.0056281	0.0159838	0.0344439	0.0258892	0.0172783
k__Bacteria	p__Firmicutes	c__Clostridia	o__Clostridiales	f__Lachnospiraceae	g__Butyrivibrio	0	0	0	0	0	0	0	0	0	0	0	0	0	0	0	0	0	0	0	0	0	0	0	0	0	0	0	0	0	0	0	0	0	0	0	0	0	0	0	0	0	0	0	0
k__Bacteria	p__Firmicutes	c__Clostridia	o__Clostridiales	f__Lachnospiraceae	g__Coprococcus	0.0145205	0.00337686	0.0166592	0.00393967	0.00703512	0.00213868	0.0047276	0.00309545	0.0114813	0.0142391	0.0231315	0.0094552	0.0141828	0.0309545	0.00106934	0.0091738	0.0139577	0.0181787	0.00388339	0.00962404	0.00782305	0.0163778	0.00900495	0.0185727	0.00714768	0.00219496	0.00906123	0.00968032	0.00844214	0.00461504	0.00230752	0.00602206	0.000844214	0.0255516	0.00568438	0.00731652	0.00545925	0.0420419	0.0102994	0.00416479	0.00422107	0.0229626	0.0284219	0.00489644
k__Bacteria	p__Firmicutes	c__Clostridia	o__Clostridiales	f__Lachnospiraceae	g__Dorea	0.0044462	0.00360198	0.00714768	0.00585322	0.0026452	0.0014633	0.0038271	0.00225124	0.00838586	0.00298289	0.00242008	0.00427735	0.00371454	0.00399595	0.000731652	0.0299415	0.00168843	0.0152521	0.00275777	0.00512157	0.00360198	0.0155335	0.00889239	0.00467132	0.00669743	0.00557181	0.00416479	0.00675371	0.00315173	0.00168843	0.00202611	0.000506529	0.00191355	0.0112562	0.00422107	0.00348942	0.00371454	0.00765421	0.00140702	0.00101306	0.00484016	0.00557181	0.00844214	0.00247636
k__Bacteria	p__Firmicutes	c__Clostridia	o__Clostridiales	f__Lachnospiraceae	g__Epulopiscium	0	0	0	0	0	0	5.6281e-05	0	0	0	0	0	0	0	0	0	0	0	0	0	0	0	0	0	0	0	0	0	5.6281e-05	0	0	0	0	0	0	0	0	0	0	0	0	0	0	0
k__Bacteria	p__Firmicutes	c__Clostridia	o__Clostridiales	f__Lachnospiraceae	g__Lachnobacterium	0	0	0	0	0.000393967	0	0	5.6281e-05	0.0035457	5.6281e-05	0	0.000112562	0	0	0	0	5.6281e-05	0	0.000675371	0	0	0	0.00242008	0	0	0.000900495	5.6281e-05	0	0	0	0	0.000225124	0	0.000112562	0	5.6281e-05	0	0	5.6281e-05	0.000844214	0	0	0	0.000112562
k__Bacteria	p__Firmicutes	c__Clostridia	o__Clostridiales	f__Lachnospiraceae	g__Lachnospira	0.00191355	0.0199797	0.0111436	0.00303917	0.0162089	0.127701	0	0.00332058	0.00793561	0.00433363	0.0402972	0.00213868	0.00630347	0.00574066	0.00613462	0.00056281	0.0131697	0.00163215	0.00934264	0	0.0173908	0.0120441	0.00934264	0.00371454	0.0032643	0.00686628	0.00230752	0.025833	0.00157587	0.00996173	0.0047276	0.00545925	5.6281e-05	0.00551553	0.0070914	0.0119878	0.0020824	0.000225124	0.0149145	0.00213868	0.0165466	0.0011819	0.00771049	0.00168843
k__Bacteria	p__Firmicutes	c__Clostridia	o__Clostridiales	f__Lachnospiraceae	g__Moryella	0	0	0	0	0	0	0	0	0	0	0	0	0	0	0	0	0	0	0	0	0	0	0	0	0	0	0	5.6281e-05	0.000225124	0	0	0	0	0	0	0	0	0	0	0	0	0	0	0
k__Bacteria	p__Firmicutes	c__Clostridia	o__Clostridiales	f__Lachnospiraceae	g__Oribacterium	0	0	0	0	0	0	0	0	0	0	0	0	0	0	0	0	0	0	0	0	0.000112562	0	0	0	0	0	0	0	0	0	0	0	0	0	0	0	0	0	0	0	0.000168843	0	0	0
k__Bacteria	p__Firmicutes	c__Clostridia	o__Clostridiales	f__Lachnospiraceae	g__Roseburia	0.00298289	0.00635975	0.00551553	0.000112562	0.00450248	0.0225687	0.00129446	0.00934264	0.00287033	0.000619091	0.00410851	0.00191355	0.00427735	0.00287033	0.00703512	0.000281405	0.0032643	0.00399595	0.0140702	0.000393967	0.00782305	0.0224561	0.00196983	0.0011819	0.0032643	0.00675371	0.00388339	0.000393967	0.00135074	0.00877983	0.012213	0.00123818	0.00416479	0.00923008	0.0014633	0.00365826	0.000225124	0.0020824	0.0056281	0.00270149	0.00534669	0.000281405	0.00568438	0.0227938
k__Bacteria	p__Firmicutes	c__Clostridia	o__Clostridiales	f__Lachnospiraceae	g__[Ruminococcus]	0.00872355	0.00275777	0.012213	0.00804818	0.00337686	0.00551553	0.0708577	0.00360198	0.010018	0.00315173	0.00557181	0.00793561	0.00720396	0.0133949	0.010412	0.0130572	0.00405223	0.0209928	0.0240882	0.0141265	0.00320801	0.0207677	0.0122692	0.00720396	0.0145768	0.00292661	0.0106934	0.0111999	0.0133949	0.00512157	0.00399595	0.00258892	0.00416479	0.0231315	0.0059095	0.00168843	0.00816074	0.0254953	0.00140702	0.0014633	0.00348942	0.010412	0.00877983	0.00422107
k__Bacteria	p__Firmicutes	c__Clostridia	o__Clostridiales	f__Peptococcaceae	Other Peptooccaceae	0	0	0	0	0	0	0	0.000337686	0	0	0	0	0	0	0	0	0	0	0	0	0	0	0	0	0	0	0	0	0	0	0	0	0	0	0	0	0	0	0	0	0	0	0	0
k__Bacteria	p__Firmicutes	c__Clostridia	o__Clostridiales	f__Peptococcaceae	g__(Peptococcaceae)	0.000168843	0	0	0	0.000112562	0	0	0	0.000168843	0.000168843	0.000450248	0.000675371	0	0	0	0	0.000112562	0	0	0.000225124	0	0	5.6281e-05	0	0	0	0	0.000168843	0	0	0	0	0	0	0	0	0.00056281	0	0	0.000450248	0	0	0	0
k__Bacteria	p__Firmicutes	c__Clostridia	o__Clostridiales	f__Peptococcaceae	g__Peptococcus	0	0	0	0	0	0	0	0.00196983	0	0	0	0	0	0	0	5.6281e-05	0	0	0	0	0	0	0	0	0	0	0	0	5.6281e-05	0.000450248	0	0	0	0	0	0	0	0	0	0	0	0	0	0
k__Bacteria	p__Firmicutes	c__Clostridia	o__Clostridiales	f__Peptococcaceae	g__rc4-4	0	0	0	0	0	0	0	5.6281e-05	0	0	0	0	0	0	0	0	0	5.6281e-05	0	0	0	0	5.6281e-05	0.000112562	0.00056281	0	0	0	0	0	0	0	0	0	0	0	0.000393967	5.6281e-05	0	0	0	0	0.000168843	0
k__Bacteria	p__Firmicutes	c__Clostridia	o__Clostridiales	f__Peptostreptococcaceae	Other (Peptostreptococcaceae)	0	0	0	0	0	0	0	0	0	0	0	0	0	0	0	0	0	0	0	0	0	0	0	0	0	0	0	0	0	0	0	0	0	0	0	0	0	0	0	0	0	0	0	0.000112562
k__Bacteria	p__Firmicutes	c__Clostridia	o__Clostridiales	f__Peptostreptococcaceae	g__(Peptostreptococcaceae)	0	0	5.6281e-05	0.000225124	0.000112562	5.6281e-05	0.000225124	0.000787933	0.000168843	5.6281e-05	0	5.6281e-05	0	5.6281e-05	0	0.000168843	0	0.000112562	0.000168843	5.6281e-05	0	0	0.000112562	0	0.000225124	0	0	0.000337686	0.000225124	0.000112562	0.000112562	5.6281e-05	0.000225124	0.000337686	0	0	0	0	0	0.000168843	0	0	0.000112562	0
k__Bacteria	p__Firmicutes	c__Clostridia	o__Clostridiales	f__Peptostreptococcaceae	g__Peptostreptococcus	0	0	0	0	0	0	0	0	0	0	0	0	0	5.6281e-05	0	0	0	0	0	0	5.6281e-05	0	0	0	0	0	0	0	0.000112562	0	0	0	0	0	0	0	0	0	0	0	0	0	0	0
k__Bacteria	p__Firmicutes	c__Clostridia	o__Clostridiales	f__Ruminococcaceae	Other (Ruminococcaeae)	0.00529041	5.6281e-05	0.000506529	0.000168843	0.00742909	0	0	0.000337686	0.000787933	0.00101306	0.00365826	0.000225124	0.000619091	0.00140702	5.6281e-05	0.0423233	0.000168843	0.00168843	5.6281e-05	0.0205988	0.000168843	0.000393967	0.00360198	0.00669743	0.00112562	0	0.000675371	0.000450248	0.000506529	0.000112562	0.00337686	0.00225124	0.000112562	0.00112562	0.000112562	0.000337686	0.000956776	0.000506529	0.000393967	0.0284782	0.000168843	0.00129446	0.000844214	0.000393967
k__Bacteria	p__Firmicutes	c__Clostridia	o__Clostridiales	f__Ruminococcaceae	g__(Ruminococcaeae)	0.101137	0.0295475	0.0437866	0.0856596	0.042661	0.0182913	0.0185164	0.178129	0.0902747	0.278422	0.0713643	0.0832958	0.104345	0.0996736	0.00320801	0.158375	0.0566749	0.0596578	0.0128883	0.197546	0.0515534	0.110592	0.124606	0.155279	0.230414	0.0226249	0.0453062	0.0383273	0.0287596	0.0374268	0.0279154	0.178242	0.0345565	0.0823953	0.0260018	0.122073	0.144867	0.191974	0.0807069	0.120329	0.0562247	0.160457	0.190398	0.026846
k__Bacteria	p__Firmicutes	c__Clostridia	o__Clostridiales	f__Ruminococcaceae	g__Anaerotruncus	0.000731652	0	5.6281e-05	5.6281e-05	0.000112562	0	0	0.000112562	0	5.6281e-05	0	0.00056281	0.000225124	0.000787933	0.00230752	0.0038271	5.6281e-05	0.000393967	0	5.6281e-05	0.000225124	5.6281e-05	0.000112562	0.000168843	0.00303917	0.00270149	0.000393967	0.000787933	0.000112562	0.000337686	5.6281e-05	0	0	0.000337686	0	0	0	5.6281e-05	0.000168843	0	5.6281e-05	0.000450248	0.000281405	0.000168843
k__Bacteria	p__Firmicutes	c__Clostridia	o__Clostridiales	f__Ruminococcaceae	g__Faecalibacterium	0.0345565	0.0477825	0.0907812	0.0267897	0.0696195	0.0223998	0.102825	0.0898244	0.0312359	0.0934264	0.0407474	0.0488519	0.0167717	0.0620216	0.000112562	0.00731652	0.0283656	0.0321927	0.0459253	0.00298289	0.0615151	0.0463192	0.0812697	0.106258	0.0821139	0.035457	0.0189104	0.0337123	0.0101306	0.0821702	0.0427172	0.0682688	0.0203174	0.0631472	0.0360198	0.0862224	0.083127	0.0848717	0.0601643	0.0558307	0.0734466	0.00844214	0.124212	0.042661
k__Bacteria	p__Firmicutes	c__Clostridia	o__Clostridiales	f__Ruminococcaceae	g__Oscillospira	0.00962404	0.00529041	0.00574066	0.00861099	0.00681	0.000844214	0.000506529	0.00551553	0.00900495	0.0117627	0.0082733	0.0111436	0.0104683	0.0263395	0.0109185	0.014014	0.00551553	0.00928636	0.00478388	0.0299977	0.00765421	0.0138451	0.0267335	0.0157024	0.0139014	0.0220621	0.0128883	0.00686628	0.0108059	0.0118753	0.00523413	0.0141828	0.00365826	0.0111436	0.0035457	0.000675371	0.0117064	0.00877983	0.00478388	0.00816074	0.00467132	0.0278591	0.0217807	0.00635975
k__Bacteria	p__Firmicutes	c__Clostridia	o__Clostridiales	f__Ruminococcaceae	g__Ruminococcus	0.205313	0.000337686	0.0744597	0.0211616	0.110705	0.00714768	0.00106934	0.0131697	0.0230189	0.048683	0.0184602	0.0170531	0.108735	0.094158	0.000675371	0.020824	0.011819	0.0589824	0.00151959	0.0231315	0.00652859	0.0287033	0.0575754	0.086335	0.0492458	0.00467132	0.0291535	0.0181225	0.0240882	0.0209365	0.0011819	0.0194169	0.00804818	0.0420982	0.0035457	0.0539734	0.0496961	0.023244	0.0528478	0.0171094	0.00861099	0.0507091	0.00545925	0.0152521
k__Bacteria	p__Firmicutes	c__Clostridia	o__Clostridiales	f__Veillonellaceae	Other Veillonellaceae	0	0	0	0	0	0	0.000225124	0	0	0.000112562	0	0.000168843	0	0	0	0	0	0	5.6281e-05	0	0	0	0	0	0	0	0.000281405	0	0	0	0	0	0.000112562	0	0	0	0	0	0	0	0	0	0	0
k__Bacteria	p__Firmicutes	c__Clostridia	o__Clostridiales	f__Veillonellaceae	g__Veillonealleaceae	0	0	0	0	0	0	0	0	0.000168843	0.000225124	0	0	0	0	0.000225124	0	0.000112562	0	0	0	0	0	0	0	0	0	0	0	0	0	0	0	0	0	0	0	0	0	0	0	0	0	0.000112562	0
k__Bacteria	p__Firmicutes	c__Clostridia	o__Clostridiales	f__Veillonellaceae	g__Acidaminococcus	0	0	0	0	0	0.00157587	0	0	0	0	0	0	0	0	0	0	0.00213868	0	0	0	0	0	0	0	0	0	0.0151396	0	0	0	0	0	0.00106934	0.00692256	0.000225124	0	0	0	0	0	0	0	0.00484016	0
k__Bacteria	p__Firmicutes	c__Clostridia	o__Clostridiales	f__Veillonellaceae	g__Anaeromusa	0	0	0	0	0	0	0	0	0	0	0	0	0	0	0	0	0	0	0	0	0	0	0	0	0	0	0	0	0	0	0	0	0	0	0	0	0	0	0	0	0	0	0	0
k__Bacteria	p__Firmicutes	c__Clostridia	o__Clostridiales	f__Veillonellaceae	g__Dialister	0	0.000168843	0.000281405	0.000225124	0.000281405	0	0	0.000337686	0.00332058	0	0	0	0	0	5.6281e-05	0	0	0	0.00225124	0	0.000393967	0.000393967	0	0.000112562	0.000112562	0	5.6281e-05	0	0.000844214	5.6281e-05	0	0.0026452	0.00405223	0.000956776	0	0.000956776	0	0	0.000393967	0.00163215	0	5.6281e-05	0	5.6281e-05
k__Bacteria	p__Firmicutes	c__Clostridia	o__Clostridiales	f__Veillonellaceae	g__Megamonas	0	0	0	0	0	0	0	0	0	0.000393967	0	0	5.6281e-05	0	0	0	0	0	0	0.000506529	0	0	0	0	0	0	0	0	0	0	0	0.00140702	0.00202611	0	0	0	0	0	0	0	0	0	0	0
k__Bacteria	p__Firmicutes	c__Clostridia	o__Clostridiales	f__Veillonellaceae	g__Megasphaera	0	0	0	0	0	0.000168843	0	0	0.0252139	0	0	0	0	0	0	0	0.00196983	0	0	0	0	0	0	0	0	0	0	0	0	0	0	0	0.010412	0.000506529	0.00399595	0	0	0	0	0	0	0	0.00196983	0
k__Bacteria	p__Firmicutes	c__Clostridia	o__Clostridiales	f__Veillonellaceae	g__Mitsuokella	0	0	0	0	0	0	0	0	0.00281405	0.00151959	0	0	0	0	0	0	0.00123818	0	0	0	0	0	0	0	0	0	0	0	0	0	0	0	5.6281e-05	0.000112562	0	0	0	0	0	0	0	0	0.00140702	0
k__Bacteria	p__Firmicutes	c__Clostridia	o__Clostridiales	f__Veillonellaceae	g__Pectinatus	0	0	0	0	0	0	0	0	0	0	0	0	0	0	0	0	0	0	0	0	0	0	0	0	0	0	0	0	0	0	0	0	0	0	0	0	0	0	0	0	0	0	0	0
k__Bacteria	p__Firmicutes	c__Clostridia	o__Clostridiales	f__Veillonellaceae	g__Phascolarctobacterium	0.00506529	0.00422107	0.000956776	0.000731652	0	0	0	0	0.00056281	0.00270149	0.0115939	0.00979289	0.00377082	0.0115376	0	0.00911751	0.00484016	0.000956776	0	0.0121004	0	0	0.013226	0.00247636	0.00377082	0.00568438	0.00517785	0.0023638	0	0	0.00495272	0	0.000675371	5.6281e-05	0.00765421	0	0.00703512	0.00692256	0	0.00461504	0.00393967	0.000337686	0.00613462	0.00185727
k__Bacteria	p__Firmicutes	c__Clostridia	o__Clostridiales	f__Veillonellaceae	g__Selenomonas	0	0	0	0	0	0	0.000112562	0	0	0	0	0	0	0	0	0	0	0	0	0	0	0	0	0	0	0	0	0	0	0	0	0	0	0	0	0	0	0	0	0	0	0	0	0
k__Bacteria	p__Firmicutes	c__Clostridia	o__Clostridiales	f__Veillonellaceae	g__Sporomusa	0	0	0	0	0	0	0	0	0	0	0	0	0	0	0	0	0	0	0	0	0	0	0	0	0	0	0	0	0	0	0	0	0	0	0	0	0	0	0	0	0	0	0	0
k__Bacteria	p__Firmicutes	c__Clostridia	o__Clostridiales	f__Veillonellaceae	g__Veillonella	0	0	0	0	0	0.00242008	0.0158712	0.000112562	0	0	0	0	0	5.6281e-05	0	0	0	0	0	0	5.6281e-05	0	0	0	0	0	0	0	0	5.6281e-05	0	0.000225124	0	0	5.6281e-05	5.6281e-05	0	0	0	0	0.000112562	0	0.000281405	5.6281e-05
k__Bacteria	p__Firmicutes	c__Clostridia	o__Clostridiales	f__[Mogibacteriaceae]	Other Mogibacteriaceae	0	0	0	0	0	0	0	0	0	5.6281e-05	0	0	0	0	0	0	0	0	0	5.6281e-05	0	0	0	0.000168843	0	0	0	0	0	0	0	0	0	0	0	0	0.000112562	5.6281e-05	0	0	0	0	0	0
k__Bacteria	p__Firmicutes	c__Clostridia	o__Clostridiales	f__[Mogibacteriaceae]	g__(Mogibacteriaceae)	0.000844214	0	0.00129446	0.000844214	0.000225124	0	0	0.000225124	0.0014633	0.000393967	0.000619091	0.000787933	0.00106934	0.00123818	0	0.00163215	0.000393967	0.000675371	5.6281e-05	0.00123818	0.00101306	0.000281405	0.00157587	0.00157587	0.000450248	5.6281e-05	0.00056281	0.000337686	0.000281405	0.000337686	0	0.000225124	0.000281405	0.000675371	0.000112562	0.000281405	0.0011819	0.00168843	0.000112562	0	0	0.000450248	0.00106934	5.6281e-05
k__Bacteria	p__Firmicutes	c__Clostridia	o__Clostridiales	f__[Mogibacteriaceae]	g__Anaerovorax	0	0	0	0	0	0	0	5.6281e-05	0	0	0	0	0	0	0	0	0	0	0	0	0	0	0	5.6281e-05	0	0	0	0	0	0	0	0	0	0	0	0	0	5.6281e-05	0	0	0.000112562	0	0	0
k__Bacteria	p__Firmicutes	c__Clostridia	o__Clostridiales	f__[Mogibacteriaceae]	g__Mogibacterium	0	0	0	0	0	0	0	0	0	0	0	5.6281e-05	0	0	0	0.000281405	0	0	0	0	0	0	0	0	0	5.6281e-05	5.6281e-05	0	0	0	0	0	0	5.6281e-05	0	5.6281e-05	0	0	0	0	0	0	0	0
k__Bacteria	p__Firmicutes	c__Clostridia	o__Clostridiales	f__[Tissierellaceae]	g__(Tissierellaceae)	0	0	0	0	0	0	0	0	0	0	0	0	0	0	0	0.000112562	0	0	0	0	0	0	0	0	0	0	0	0	0	0	0	0	0	0	0	0	0	0	0	0	0	0	0	0
k__Bacteria	p__Firmicutes	c__Clostridia	o__Clostridiales	f__[Tissierellaceae]	G__1-68 (Tissierellaceae)	0	0	0	0	0	0	0	0	0	0	0	0	0	0	0	5.6281e-05	0	0	0	0.000450248	0	0	0	0	0	0	5.6281e-05	0	5.6281e-05	0	0	0	0	0	0	0	0	0	0	0	0	0	0	0
k__Bacteria	p__Firmicutes	c__Clostridia	o__Clostridiales	f__[Tissierellaceae]	g__Anaerococcus	5.6281e-05	0	0	0	0	0	5.6281e-05	0	0	0.0011819	0	5.6281e-05	0	0	0	0.000168843	0	0	0.000112562	0.000168843	0	0	0.000112562	5.6281e-05	0	5.6281e-05	0	0	0.000168843	0	0	0	0	0	0	0	0	5.6281e-05	0	0	0	0	0	0
k__Bacteria	p__Firmicutes	c__Clostridia	o__Clostridiales	f__[Tissierellaceae]	g__Finegoldia	0	0	0	0	0	0	0	0	0	0	0	0	0	0	0	0	0	0	0.000225124	5.6281e-05	0	0	0.000112562	5.6281e-05	0	0.000112562	0	0	0	0	0	0	0	0	0	0	0	0	0	0	0	0	0	0
k__Bacteria	p__Firmicutes	c__Clostridia	o__Clostridiales	f__[Tissierellaceae]	g__Parvimonas	0	0	0	0	0	0	0	0	0	0	0	0	0	0	0	0	0	0	0	0	0	0	0	0	0	0	0	5.6281e-05	0	0	0	0	0	0	0	0	0	0	0	0	0	0	0	0
k__Bacteria	p__Firmicutes	c__Clostridia	o__Clostridiales	f__[Tissierellaceae]	g__Peptoniphilus	0.000225124	0	0	0	0	0	0	0.000225124	0	0	5.6281e-05	0	0	0	0	0.00056281	0	0.000225124	0.000112562	0.000900495	0	0	0	5.6281e-05	0.000112562	0.000168843	0.000112562	5.6281e-05	0.000675371	0	0	0	5.6281e-05	0	0	0	0	0	0	0	0	0	0	0
k__Bacteria	p__Firmicutes	c__Clostridia	o__Clostridiales	f__[Tissierellaceae]	g__Sporanaerobacter	0	0	0	0	0	0	0	0	0	0	0	0	0	0	0	0	0	0	0	0	0	0	0	0	0	0	0	0	0	0	0	0	0	0	0	0	0	0	0	0	5.6281e-05	0	0	0
k__Bacteria	p__Firmicutes	c__Clostridia	o__Clostridiales	f__[Tissierellaceae]	g__Tissierella_Soehngenia	0	0	5.6281e-05	0	0	0	0	0	0	0	0	0	0	0	0	0	0	0	0	0	0	0	0	0	0	0	0	0	0	0	0	0	0	0	0	0	0	0	0	0	0	0	0	0
k__Bacteria	p__Firmicutes	c__Clostridia	o__Clostridiales	f__[Tissierellaceae]	g__WAL_1855D	0	0	0	0.000225124	0	0	0	0	0	0	0	0	0	5.6281e-05	0	0.000506529	0	5.6281e-05	0.000337686	0	0	0	0	5.6281e-05	5.6281e-05	0.00151959	0	0.000337686	0.000844214	0	5.6281e-05	0	0.00056281	0	0	0	0	5.6281e-05	0	0	0	0	0	0
k__Bacteria	p__Firmicutes	c__Clostridia	o__Clostridiales	f__[Tissierellaceae]	g__ph2	0	0	0	0	0	0	0	0	0	0	0	0	0	0	0	5.6281e-05	0	5.6281e-05	0.000168843	0	0	0	5.6281e-05	0	0.000112562	5.6281e-05	0	0	0.000506529	0	0	0	0	0	0	0	0	0	0	0	0	0	0	0
k__Bacteria	p__Firmicutes	c__Clostridia	o__Natranaerobiales	f__	g__(Natranaerobiales)	0	0	0	0	0	0	0	0	0	0	0	0	0	0	0	0	0	0	0	0	0	0	0	0	0	0	0	0	0	0	0	0	0	0	0	0	0	0	0	0	0	0	0	0
k__Bacteria	p__Firmicutes	c__Clostridia	o__SHA-98	f__	g__(Clostridia)	0	0	0	0	0	0	0	0	0	0	0	0	0	0	0	0	0	0	0	0	0	0	0	0.000112562	0	0	0	0	0	0	0	0	0	0	0	0	0	0	0	0	0	0	0	0
k__Bacteria	p__Firmicutes	c__Erysipelotrichi	o__Erysipelotrichales	f__Erysipelotrichaceae	Other	0	0	0	0	0	0	0	0	0	0	0	0	0	0	0	0	0	5.6281e-05	0	0	0	0	0	0	0	0	0	0	0	0	0	0	0	0	0	0	0	0	0	0	0	0	0	0
k__Bacteria	p__Firmicutes	c__Erysipelotrichi	o__Erysipelotrichales	f__Erysipelotrichaceae	g__(Erysipelotrichaceae)	0.00984917	0.0387213	0.0343314	0.0038271	0.00309545	0.00951148	0.0494147	0.00337686	0.00163215	5.6281e-05	0.0320239	0.0183476	0.0133949	0.000225124	0.00219496	0.00112562	0.00168843	0.0193044	0.031855	0.00196983	0.00771049	0.0302792	0.0082733	0.00219496	0.00196983	0.00163215	0.0313485	0.00855471	0.000956776	0.0059095	0.0132823	0.00151959	0.00405223	0.0333746	0.00230752	0.00410851	0.00410851	0.0320801	0.00135074	0.000844214	0.0317425	0.012213	0.0180099	0.00360198
k__Bacteria	p__Firmicutes	c__Erysipelotrichi	o__Erysipelotrichales	f__Erysipelotrichaceae	g__Bulleidia	0	0	0	0	0	0	5.6281e-05	0	0	0	0	0	0	0	0	0.000506529	0	0	5.6281e-05	0	0	0.000112562	0	0	0	0	0	0.000112562	0	0	0	0	0	5.6281e-05	0	0	0	0	0	0	0	0	0	0
k__Bacteria	p__Firmicutes	c__Erysipelotrichi	o__Erysipelotrichales	f__Erysipelotrichaceae	g__Catenibacterium	0	0	0	0	0	0	0	0	0.0315736	0.0178973	0	0	0.00106934	0.0807069	0	0.0115939	0	0	0	0	5.6281e-05	0	0	0	0	5.6281e-05	0	0	0	0	0	0	0	0.000900495	0.0921319	0	0	0	0	0.00652859	0	0	0	0.0056281
k__Bacteria	p__Firmicutes	c__Erysipelotrichi	o__Erysipelotrichales	f__Erysipelotrichaceae	g__Coprobacillus	5.6281e-05	0	0	5.6281e-05	0	0.000112562	0	0	0	0	0	0.000168843	5.6281e-05	5.6281e-05	0.00180099	0	0	0.000168843	0.000112562	0.000675371	5.6281e-05	0.000675371	5.6281e-05	5.6281e-05	0.00135074	0.00320801	5.6281e-05	0.00163215	5.6281e-05	0.000506529	5.6281e-05	0	0	0.000506529	5.6281e-05	0	0	0	0.000112562	0	0	0.000112562	5.6281e-05	0
k__Bacteria	p__Firmicutes	c__Erysipelotrichi	o__Erysipelotrichales	f__Erysipelotrichaceae	g__Holdemania	0.00106934	0.000225124	5.6281e-05	5.6281e-05	0.000168843	0.000619091	0	0	0.000281405	0.000112562	0.000112562	0.000112562	0.000450248	0.000450248	0	0.000168843	5.6281e-05	0.000393967	0	0.000337686	0.000281405	0.000168843	0.000393967	0.000168843	5.6281e-05	0.00151959	0.000168843	0.000675371	5.6281e-05	0.000731652	0.000337686	5.6281e-05	0	0.000225124	5.6281e-05	5.6281e-05	0	5.6281e-05	0	5.6281e-05	0.00056281	0.000281405	0.000506529	5.6281e-05
k__Bacteria	p__Firmicutes	c__Erysipelotrichi	o__Erysipelotrichales	f__Erysipelotrichaceae	g__PSB-M-3	0	0	0	5.6281e-05	0	0	0	0	0	0	0	0	0	0	0	5.6281e-05	0	0	0	0	0	0	5.6281e-05	0	0	0	0	0	0	0	0	0.000112562	0	0	0	0	0	0	0	0	0	0	0	0
k__Bacteria	p__Firmicutes	c__Erysipelotrichi	o__Erysipelotrichales	f__Erysipelotrichaceae	g__RFN20	0	0	0	0	0	0	0	0	0	0	0	0	0	0	0	0	0	0	0	0	0	0	0	0	0	0	0	0	0	0	0	0	0	0	0	0	0	0	0	0	0	0	0	0
k__Bacteria	p__Firmicutes	c__Erysipelotrichi	o__Erysipelotrichales	f__Erysipelotrichaceae	g__[Eubacterium]	0.000619091	0.000112562	0.000393967	0.00191355	0.000506529	0.000506529	0.000168843	0.000112562	0.000337686	0.0108622	0.00106934	0.000112562	0.00129446	0.00568438	0.0139014	0.00585322	0.0229626	0.0281968	0.000450248	0.00056281	0.000393967	0	0.010412	0.00242008	0.00151959	0.00123818	0.000112562	0.000393967	0.044068	0.000225124	0.000112562	0.0154773	0.00686628	5.6281e-05	0.0348379	5.6281e-05	5.6281e-05	0.104232	0	0.00106934	5.6281e-05	0.00157587	0.00247636	0.0153647
k__Bacteria	p__Firmicutes	c__Erysipelotrichi	o__Erysipelotrichales	f__Erysipelotrichaceae	g__cc_115	0	0	0	0.000225124	0	0	0	0	0	0.000168843	0	0	0	0.00140702	0	5.6281e-05	0	0	0	0	0	0	0.00151959	0.00410851	5.6281e-05	0	0	0	0	0	0	0	0	0.000450248	0	0	0	0	0	0	0	0.000450248	0.000619091	0
k__Bacteria	p__Fusobacteria	c__Fusobacteriia	o__Fusobacteriales	f__Fusobacteriaceae	g__Fusobacterium	5.6281e-05	0	0	0.000112562	0	0.0227938	0.00174471	0	0	0	0	0	0	0	0	0.000112562	5.6281e-05	0	0.000225124	0.000450248	0	0	0	0	0	0	0	0	0.00056281	0	0.000112562	5.6281e-05	0.0521724	0	0	0.00151959	0	0	0	0	0.000337686	0	0	0
k__Bacteria	p__Fusobacteria	c__Fusobacteriia	o__Fusobacteriales	f__Leptotrichiaceae	g__Leptotrichia	0	0	0	0	0	0	0.000112562	0	0	0	5.6281e-05	0	0	0	0	0	0	0	0	0	0	0	0	0	0	0	0	0	0	0	0	0	0	0	0	0	0	0	0	0	0	0	0	0
k__Bacteria	p__Fusobacteria	c__Fusobacteriia	o__Fusobacteriales	f__Leptotrichiaceae	g__Sneathia	0	0	0	0	0	0	0	0	0	0	0	0	0	0	0	0	0	0	0	0	0	0	0	0	0	0	0	0.000787933	0	0	0	0	0	0	0	0	0	0	0	0	0	0	0	0
k__Bacteria	p__Lentisphaerae	c__[Lentisphaeria]	o__Victivallales	f__Victivallaceae	g__(Victivallaceae)	0	0	0	0	0	0	0	0	0	0.000675371	0	0	0	0.000619091	0	0.000225124	0.000337686	0	0	0.00213868	0	0	0	0	0	0	0	0	0	0	0	0	0	0	0	0	0.0023638	0.00056281	0	5.6281e-05	0	0	0	0
k__Bacteria	p__OD1	c__ABY1	o__	f__	g__(OD1)	0	0	0	0	0	0	0	0	0	0	0	0	0	0	0	0	0	0	0	0	0	0	0	0	0	0	0	0	0	0	0	0	0	0	0	0	0	0	0	0	0	0	0	0
k__Bacteria	p__OP8	c__OP8_1	o__OPB95	f__	g__(OP8)	0	0	0	0	0	0	0	0	0	0	0	0	0	0	0	0	0	0	0	0	0	0	0	0	0	0	0	0	0	0	0	0	0	0	0	0	0	0	0	0	0	0	0	0
k__Bacteria	p__OP9	c__JS1	o__BA021	f__	g__(OP9)	0	0	0	0	0	0	0	0	0	0	0	0	0	0	0	0	0	0	0	0	0	0	0	0	0	0	0	0	0	0	0	0	0	0	0	0	0	0	0	0	0	0	0	0
k__Bacteria	p__OP9	c__OPB46	o__OPB72	f__TIBD11	g__(OP9)	0	0	0	0	0	0	0	0	0	0	0	0	0	0	0	0	0	0	0	0	0	0	0	0	0	0	0	0	0	0	0	0	0	0	0	0	0	0	0	0	0	0	0	0
k__Bacteria	p__Planctomycetes	c__Planctomycetia	o__Pirellulales	f__Pirellulaceae	g__(Pirellulaceae)	0	0	0	0	0	0	0	0	0	0	0	0	0	0	0	0	0	0	0	0	0	0	0	0	0	0	0	0	0	0	0	0	0	0	0	0	0	0	0	0	0	0	0	0
k__Bacteria	p__Planctomycetes	c__Planctomycetia	o__Planctomycetales	f__Planctomycetaceae	g__Planctomyces	0	0	0	0	0	0	0	0	0	0	0	0	0	0	0	0	0	0	0	0	0	0	0	0	0	0	0	0	0	0	0	0	0	0	0	0	0	0	0	0	0	0	0	0
k__Bacteria	p__Proteobacteria	c__Alphaproteobacteria	o__Caulobacterales	f__Caulobacteraceae	g__(Caulobacteraceae)	0	0	0	0	0	0	0	0	0	0	0	0	0	0	0	0	0	0	0	0	0	0	0	0	0	0	0	0	0	0	0	0	0	0	0	0	0	0	0	0	0	0	0	0
k__Bacteria	p__Proteobacteria	c__Alphaproteobacteria	o__RF32	f__	g__(RF32)	0	0	0.022231	0	0	0	0	0	0	0	0	0	0.00185727	0.00371454	0	0	0	0.00298289	0	0.0023638	0	0	0.00196983	0	0.00602206	0	0.00242008	0	0	0	0	0	0	0	0	5.6281e-05	0.00219496	0	0	0.000112562	0.000281405	0	0	0
k__Bacteria	p__Proteobacteria	c__Alphaproteobacteria	o__Rhizobiales	f__Bradyrhizobiaceae	g__(Bradyrhizobiaceae)	0	0	0	0	0	0	0	0	0	0	0	0	0	0	0	0	0	0	0	0	0	0	0	0	0.000337686	0	0	0	0	0	0	0	0	0	0	0	0	0	0	0	0	0	0	0
k__Bacteria	p__Proteobacteria	c__Alphaproteobacteria	o__Rhizobiales	f__Hyphomicrobiaceae	g__Hyphomicrobium	0	0	0	0	0	0	0	0	0	0	0	0	0	0	0	0	0	0	0	0	0	0	0	0	0	0	0	0	0	0	0	0	0	0	0	0	0	0	0	0	0	0	0	0
k__Bacteria	p__Proteobacteria	c__Alphaproteobacteria	o__Rhizobiales	f__Hyphomicrobiaceae	g__Parvibaculum	0	0	0	0	0	0	0	0	0	0	0	0	0	0	0	0	0	5.6281e-05	0	0	0	0	0	0	0	0	0	0	0	0	0	0	0	0	0	0	0	0	0	0	0.000112562	0	0	0
k__Bacteria	p__Proteobacteria	c__Alphaproteobacteria	o__Rhizobiales	f__Rhizobiaceae	g__(Rhizobiaceae)	0	0	0	0	0	0	0	0	0	0	0	0	0	0	0	0	0	0	0	0	0	0	0	0	0	0	0	0	0	0	0	0	0	0	0	0	0	0	0	0	0	0	0	0
k__Bacteria	p__Proteobacteria	c__Alphaproteobacteria	o__Sphingomonadales	f__Sphingomonadaceae	g__Sphingomonas	0	0	0	0	0	0	0	0	0	0	0	0	0	0	0	0	0	0	0	0	0	0	0	0	0.000675371	0	0	0	0	0	0	0	0	0	0	0	0	0	0	0	0	0	0	0
k__Bacteria	p__Proteobacteria	c__Betaproteobacteria	o__Burkholderiales	Other	Other	0	0	0	0	0	0	0	0	0	0	0	0	0	0	0	0	0	0	0	0	0	0	0	0	0	0	0	0	0	0	0	0	0	0	0	0	0	0	0	0	0	0	0	0
k__Bacteria	p__Proteobacteria	c__Betaproteobacteria	o__Burkholderiales	f__	g__(Burkholderiales)	0	0	5.6281e-05	0	0	0	0	0	0	0	0	0	0	0	0	0	0	0	0	5.6281e-05	0	0	0	0	0	0	0	0	0	0	0	0	0	0	0	0	0	0	0	0	0	0	0	0
k__Bacteria	p__Proteobacteria	c__Betaproteobacteria	o__Burkholderiales	f__Alcaligenaceae	Other	0	0	0	0	0	0	0	0	0	0	0	0	0	0	0	0	0	0	0	0	0	0	0	0	0	0	0	0	0	0	0	0	5.6281e-05	0	0	0	0	0	0	0	0	0	0	0
k__Bacteria	p__Proteobacteria	c__Betaproteobacteria	o__Burkholderiales	f__Alcaligenaceae	g__(Alcaligenaceae)	0	0	0	0	0	0	0	0	0	0	0	0	0	0	0	0	0	0	0	0	0	0	0	0	0	0	0	0	0	0	0	0	0	0	0	0	0	0	0	5.6281e-05	0	0	0	0
k__Bacteria	p__Proteobacteria	c__Betaproteobacteria	o__Burkholderiales	f__Alcaligenaceae	g__Sutterella	0.00652859	0.00422107	0.0270149	0.00242008	0.00551553	0.00619091	0.016828	0.000168843	0.00151959	0.00213868	0.00298289	0.00939892	0.0138451	5.6281e-05	0.0798064	0.0129446	0.00337686	0.00500901	0.0195295	0.00816074	0.0159275	0.035457	0.0192481	0.000393967	0	0.0392841	0.0269586	0.0082733	0.00213868	0.0194169	0.0130009	0.024032	0.0257767	0.00731652	0.0228501	0.00247636	0.00748537	0.00180099	0.00360198	0.00180099	0.00619091	0	0.00202611	0.0142954
k__Bacteria	p__Proteobacteria	c__Betaproteobacteria	o__Burkholderiales	f__Burkholderiaceae	g__Lautropia	0	0	0	0	0	0	0	0	0	0	0	0	0	0	0	0	0	0	0	0	0	0	0	0	0	0	0	5.6281e-05	0	0	0	0	0	0	0	0	0	0	0	0	0	0	0	0
k__Bacteria	p__Proteobacteria	c__Betaproteobacteria	o__Burkholderiales	f__Comamonadaceae	Other	0	0	0	0	0	0	0	0	0	0	0	0	0	0	0	0	0	0	0	0	0	0	0	0	0	0	0	0	0	0	0	0	0	0	5.6281e-05	0	0	0	0	0	0	0	0	0
k__Bacteria	p__Proteobacteria	c__Betaproteobacteria	o__Burkholderiales	f__Comamonadaceae	g__(Comamonadaceae)	0	0	0	0	0	0	0	0	0	0.000168843	0	0	0	0	0	0	0	0	0	0	0	0	0	0	0.00112562	0	0	0	0	0	0	0	0.000281405	0	0.000337686	0.00191355	0	5.6281e-05	0	0.0026452	0	0	5.6281e-05	0
k__Bacteria	p__Proteobacteria	c__Betaproteobacteria	o__Burkholderiales	f__Comamonadaceae	g__Comamonas	0	0	0	0	0	0	0	0	0	0	0	0	0	0	0	0	0	0	0	0	0	0	0	0	0	0	0	0	0	0	0	0	0	0	0	0	0	0	0	0	0	0	0	0
k__Bacteria	p__Proteobacteria	c__Betaproteobacteria	o__Burkholderiales	f__Comamonadaceae	g__Methylibium	0	0	0	0	0	0	0	0	0	0	0	0	0	0	0	0	0	0	0	0	0	0	0	0	0	0	0	0	0	0	0	0	0	0	0	0	0	0	0	0	0	0	0	0
k__Bacteria	p__Proteobacteria	c__Betaproteobacteria	o__Burkholderiales	f__Oxalobacteraceae	Other (Oxalobacteraceae)	0	0	0	0	0.000112562	0	0	0	0	0	0	0	0	0	0	0	0	0	0	0.00309545	0	0	0	0	0	0	0	5.6281e-05	0	0	0	0	0	0	0	0	0	0	0	0	0	0.000844214	0	0
k__Bacteria	p__Proteobacteria	c__Betaproteobacteria	o__Burkholderiales	f__Oxalobacteraceae	g__(Oxalobacteraceae)	0	0	0	0	0	0	0	0	0	0	0	0	0	0	0	0	0	0	0	0	0	0	0	0	0	0	0	0	0	0	0	0	0	0	0	0	0	0	0	0	0	0	0	0
k__Bacteria	p__Proteobacteria	c__Betaproteobacteria	o__Burkholderiales	f__Oxalobacteraceae	g__Oxalobacter	0.000112562	0	0.000450248	0	0	0	0	0	0	0	0.000168843	0	0	0	0	0.000393967	0	0	0	0.000112562	0	0	0.000168843	0	0	0	0	0.000844214	0	0	0	0	0	0	0	0	0	0.00101306	0	0	0	0.000112562	0	0.000168843
k__Bacteria	p__Proteobacteria	c__Betaproteobacteria	o__Neisseriales	f__Neisseriaceae	g__Neisseria	0	0	0	0	0	0.000112562	5.6281e-05	0	0	0	0	0	0	0	0	0	0	0	0	0	5.6281e-05	0	0	0	0	0	0	0	0	0	0	0	0	0	0	0	0	0	0	0	0	0	0	0
k__Bacteria	p__Proteobacteria	c__Betaproteobacteria	o__Rhodocyclales	f__Rhodocyclaceae	Other Rhodocyclaceae	0	0	0	0	0	0	0	0	0	0	0	0	0	0	0	0	0	0	0	0	0	0	0	0	0	0	0	0	0	0	0	0	0	0	0	0	0	0	0	0	0	0	0	0
k__Bacteria	p__Proteobacteria	c__Betaproteobacteria	o__Rhodocyclales	f__Rhodocyclaceae	g__(Rhodocyclaceae)	0	0	0	0	0	0	0	0	0	0	0	0	0	0	0	0	0	0	0	0	0	0	0	0	0	0	0	0	0	0	0	0	0	0	0	0	0	0	0	0	0	0	0	0
k__Bacteria	p__Proteobacteria	c__Betaproteobacteria	o__Rhodocyclales	f__Rhodocyclaceae	g__Candidatus Accumulibacter	0	0	0	0	0	0	0	0	0	0	0	0	0	0	0	0	0	0	0	0	0	0	0	0	0	0	0	0	0	0	0	0	0	0	0	0	0	0	0	0	0	0	0	0
k__Bacteria	p__Proteobacteria	c__Betaproteobacteria	o__Rhodocyclales	f__Rhodocyclaceae	g__Dechloromonas	0	0	0	0	0	0	0	0	0	0	0	0	5.6281e-05	0	0	0	0	0	0	0	0	0	0	0	0	0	0	0	0	0	0	0	0	0	0	0	0	0	0	0	0	0	0	0
k__Bacteria	p__Proteobacteria	c__Betaproteobacteria	o__Rhodocyclales	f__Rhodocyclaceae	g__Dok59	0	0	0	0	0	0	0	0	0	0	0	0	0	0	0	0	0	0	0	0	0	0	0	0	0	0	0	0	0	0	0	0	0	0	0	0	0	0	0	0	0	0	0	0
k__Bacteria	p__Proteobacteria	c__Betaproteobacteria	o__Rhodocyclales	f__Rhodocyclaceae	g__Sulfuritalea	0	0	0	0	0	0	0	0	0	0	0	0	0	0	0	0	0	0	0	0	0	0	0	0	0	0	0	0	0	0	0	0	0	0	0	0	0	0	0	0	0	0	0	0
k__Bacteria	p__Proteobacteria	c__Deltaproteobacteria	o__Bdellovibrionales	f__Bacteriovoracaceae	g__(Bacteriovoracaceae)	0	0	0	0	0.000112562	0	0	0	0	0	0	0	0	0	0	0	0	0	0	0	0	0	0	0	0	0	0	0	0	0	0	0	0	0	0	0	0	0	0	0	0	0	0	0
k__Bacteria	p__Proteobacteria	c__Deltaproteobacteria	o__Desulfovibrionales	f__Desulfovibrionaceae	g__(Desulfovibrionaceae)	0	0	0	0	0	0	0	0	0	0	0	0	0	0	0	0	5.6281e-05	0	0	0.00101306	0	0	0	0	0.000281405	0	0	0	0	0	0	0.000112562	0	0	0	0	0	0.000112562	0	0	0	5.6281e-05	0	0
k__Bacteria	p__Proteobacteria	c__Deltaproteobacteria	o__Desulfovibrionales	f__Desulfovibrionaceae	g__Bilophila	0.00450248	0	0.00303917	0	0.00129446	0.000281405	0.000168843	0.000450248	0.00168843	0.000506529	0.00123818	0.00174471	0.00399595	0.00652859	0.016828	0.00540297	0.000168843	0.00123818	0.00484016	0.00168843	0.00461504	0.00416479	0.00529041	0.00292661	0.000337686	0	0.0044462	0.00303917	0	0.00168843	0.000731652	0.00174471	0.000731652	0.00191355	0.00112562	0.000112562	0.00101306	0.00196983	0.000900495	0.000225124	0.00140702	0.000619091	0.000787933	0.00101306
k__Bacteria	p__Proteobacteria	c__Deltaproteobacteria	o__Desulfovibrionales	f__Desulfovibrionaceae	g__Desulfovibrio	0.000281405	0	0	0.000281405	0	0	5.6281e-05	0	0.00461504	0.00163215	0	0	0.00495272	0	0	0.0245948	0.00275777	0	0.00365826	0.00675371	0	0	0.00157587	0	0.00185727	0	0	0.00951148	0	0	0.0026452	0.0035457	5.6281e-05	5.6281e-05	0	5.6281e-05	0.0073728	0	0	0.000225124	0.00393967	0.00512157	0.00838586	0
k__Bacteria	p__Proteobacteria	c__Deltaproteobacteria	o__Desulfuromonadales	f__Geobacteraceae	g__Geobacter	0	0	0	0	0	0	0	0	0	0	0	0	0	0	0	0	0	0	0	0	0	0	0	0	0	0	0	0	0	0	0	0	0	0	0	0	0	0	0	0	0	0	0	0
k__Bacteria	p__Proteobacteria	c__Deltaproteobacteria	o__Syntrophobacterales	f__Syntrophaceae	g__(Syntrophaceae)	0	0	0	0	0	0	0	0	0	0	0	0	0	0	0	0	0	0	0	0	0	0	0	0	0	0	0	0	0	0	0	0	0	0	0	0	0	0	0	0	0	0	0	0
k__Bacteria	p__Proteobacteria	c__Deltaproteobacteria	o__Syntrophobacterales	f__Syntrophaceae	g__Syntrophus	0	0	0	0	0	0	0	0	0	0	0	0	0	0	0	0	0	0	0	0	0	0	0	0	0	0	0	0	0	0	0	0	0	0	0	0	0	0	0	0	0	0	0	0
k__Bacteria	p__Proteobacteria	c__Deltaproteobacteria	o__Syntrophobacterales	f__Syntrophobacteraceae	g__Syntrophobacter	0	0	0	0	0	0	0	0	0	0	0	0	0	0	0	0	0	0	0	0	0	0	0	0	0	0	0	0	0	0	0	0	0	0	0	0	0	0	0	0	0	0	0	0
k__Bacteria	p__Proteobacteria	c__Epsilonproteobacteria	o__Campylobacterales	f__Campylobacteraceae	g__Campylobacter	0	0	0	5.6281e-05	0	0.000225124	0.000450248	0	0	0	0	0	5.6281e-05	5.6281e-05	0	5.6281e-05	0	0	0	0	0	0	0	0.000225124	0	0	0	0.000168843	0.000225124	0	0	0	0	5.6281e-05	0	0	0	0	0	0	0.000112562	0	0	0
k__Bacteria	p__Proteobacteria	c__Epsilonproteobacteria	o__Campylobacterales	f__Helicobacteraceae	Other Helicobacteraceae	0	0	0	0	0	0	0	0	0	0	0	0	0	0	0	0	0	0	0	0	0	5.6281e-05	0	0	0	0	0	0	0	0	0	0	0	0	0	0	0	0	0	0	0	0	0	0
k__Bacteria	p__Proteobacteria	c__Gammaproteobacteria	Other	Other	Other Gammaprocteobacteria	0	0	0	0	0	0	0	0	0	0	0	0	0	0	0	0	0	0	0	0	0	0	0	0	0	0	0	0	0	0	0	0	0	0	0	0	0	0	0	0	0	0	0	0
k__Bacteria	p__Proteobacteria	c__Gammaproteobacteria	o__Alteromonadales	f__Alteromonadaceae	g__HB2-32-21	0	0	0	0	0	0	0	0	0	0	0	0	0	0	0	0	0	0	0	0	0	0	0	0	0	0	0	0	0	0	0	0	0	0	0	0	0	0	0	0	0	0	0	0
k__Bacteria	p__Proteobacteria	c__Gammaproteobacteria	o__Chromatiales	f__Ectothiorhodospiraceae	g__Ectothiorhodospiraceae	0	0	0	0	0	0	0	0	0	0	0	0	0	0	0	0	0	0	0	0	0	0	0	0	0	0	0	0	0	0	0	0	0	0	0	0	0	0	0	0	0	0	0	0
k__Bacteria	p__Proteobacteria	c__Gammaproteobacteria	o__Enterobacteriales	f__Enterobacteriaceae	Other	5.6281e-05	0	0	0	0	0.000787933	0	0	0	0	0	0.000225124	0	0	0.000112562	0.000281405	0	0	0	0.000168843	0	0	0	0	0	0	5.6281e-05	0	0	0	0	0	0	5.6281e-05	0	0	0	5.6281e-05	5.6281e-05	0	0	0	0	5.6281e-05
k__Bacteria	p__Proteobacteria	c__Gammaproteobacteria	o__Enterobacteriales	f__Enterobacteriaceae	g__Enterobacteriaceae	0.00123818	0	0.000337686	0.00534669	5.6281e-05	0.0297163	0	0	0	0.000112562	0	0.00968032	0.00332058	0.000225124	0.00151959	0.0231315	0	0.000281405	0.00056281	0.000956776	0.00399595	5.6281e-05	0.000225124	0.000225124	0.000844214	0	0.00157587	0.000225124	0.00219496	0	0.00242008	0.00270149	0.00309545	0.000281405	5.6281e-05	0.000506529	0.000112562	0.000337686	5.6281e-05	0	0.000112562	5.6281e-05	0.000619091	0.00332058
k__Bacteria	p__Proteobacteria	c__Gammaproteobacteria	o__Enterobacteriales	f__Enterobacteriaceae	g__Citrobacter	0	0	0	0	0	0	0	0	0	0	0	0	0	0	0	0	0	0	0	0	0	0	0	0	0	0	0	0	0	0	0	0	0	0	0	0	0	0	0	0	0	0	0	0
k__Bacteria	p__Proteobacteria	c__Gammaproteobacteria	o__Enterobacteriales	f__Enterobacteriaceae	g__Erwinia	0	0	0	0	0	0	0	0	0	0	0	0	0	0	0	0	0	0	0	0	0	0	0	0	0	0	0	0	0	0	0	0	0	0	0	0	0	0	0	0.00180099	0	0	0	0
k__Bacteria	p__Proteobacteria	c__Gammaproteobacteria	o__Enterobacteriales	f__Enterobacteriaceae	g__Escherichia	0	0	0	0	0	0	0	0	0	0	0	5.6281e-05	0	0	0	0	0	0	0	0	0	0	0	0	0	0	0	0	0	0	0	0	0	0	0	0	0	0	0	0	0	0	0	0
k__Bacteria	p__Proteobacteria	c__Gammaproteobacteria	o__PYR10d3	f__	g__(Gammaproteobacteria)	0	0	0	0	0	0	0	0	0	0	0	0	0	0	0	0	0	0	0	0	0	0	0	0	0	0	0	0	0	0	0	0	0	0	0	0	0	0	0	0	0	0	0	0
k__Bacteria	p__Proteobacteria	c__Gammaproteobacteria	o__Pasteurellales	f__Pasteurellaceae	Other Pasteurellaceae	0	0	0	0	0	0	0	0	0	0	0	0	0	0	0	0	0	0	0	0	0	0	0	0	0	0	0	0	0	0	0	0	0	0	0	0	0	0	0	0	0	0	0	0
k__Bacteria	p__Proteobacteria	c__Gammaproteobacteria	o__Pasteurellales	f__Pasteurellaceae	g__(Pasteurellaceae)	0	0	0	0	0	0.000112562	0.000225124	0	0	0	0	0	0	0	0	0	0	0	0	0	0	0	0	0	0	0	0	0	0	0	0	0	0	0	0	0	0	0	0	0	0	0	0	0
k__Bacteria	p__Proteobacteria	c__Gammaproteobacteria	o__Pasteurellales	f__Pasteurellaceae	g__Actinobacillus	0	0	0	0	0	5.6281e-05	0.00056281	0	0	0	0	0	0	0	0	0	0	0	0	0	0	0	0	0	0	0	0	0	0	0	0	0	0	0	0	0	0	0	0	0	0	0	0	0
k__Bacteria	p__Proteobacteria	c__Gammaproteobacteria	o__Pasteurellales	f__Pasteurellaceae	g__Aggregatibacter	0	0	0	0	0	0.000112562	0.0193044	0	0.000337686	0	0	0	0.000112562	0	0	0	0	0	0	0	0.000112562	0	0	0	0	0	0	5.6281e-05	0	0	0	0	0	0	0.000450248	0	0	0	0	0	5.6281e-05	0	0	0
k__Bacteria	p__Proteobacteria	c__Gammaproteobacteria	o__Pasteurellales	f__Pasteurellaceae	g__Haemophilus	0	0.00191355	0.00056281	0	5.6281e-05	0.0849842	0.273469	0	0.0035457	5.6281e-05	0.00123818	0	0.000450248	0.000281405	0	5.6281e-05	0	0	0.000956776	0	0.0014633	0.000168843	5.6281e-05	0	0	5.6281e-05	0	0.000337686	0.000731652	0.000112562	0.000112562	0.000337686	0.000844214	0.000112562	0.00877983	0.000281405	0.000225124	0	5.6281e-05	0	0.00219496	0	5.6281e-05	0.00056281
k__Bacteria	p__Proteobacteria	c__Gammaproteobacteria	o__Pseudomonadales	f__Moraxellaceae	g__Acinetobacter	0	0	0	0	0	0	0	0	0	0	0	0	0	0	0	0	0	0	0	0	0	0	0	0	0	0	0	0	0	0	0	0	0	0	0	0	0	0	0	0	0	0	0	0
k__Bacteria	p__Proteobacteria	c__Gammaproteobacteria	o__Pseudomonadales	f__Moraxellaceae	g__Enhydrobacter	0.000168843	0	0	0	0	0	0	0	0	0	0	0	0	0	0	0	0	0	0	0	0	0	0	0	0	0	0	0	0	0	0	0	0	0	0	0	0	0	0	0	0	0	0	0
k__Bacteria	p__Proteobacteria	c__Gammaproteobacteria	o__Pseudomonadales	f__Pseudomonadaceae	g__Pseudomonas	0	0	0	0	0	0	0	0	0	0.000619091	0	0	0	0	0	0	0	0	0	0	0	0	0	0	0	0	0	0	0.000787933	0	0.000506529	0	0	0	0	5.6281e-05	0	0	0	0	0	0	0	0
k__Bacteria	p__Proteobacteria	c__Gammaproteobacteria	o__Thiotrichales	f__Piscirickettsiaceae	g__(Piscirickettsiaceae)	0	0	0	0	0	0	0	0	0	0	0	0	0	0	0	0	0	0	0	0	0	0	0	0	0	0	0	0	0	0	0	0	0	0	0	0	0	0	0	0	0	0	0	0
k__Bacteria	p__Proteobacteria	c__Gammaproteobacteria	o__Xanthomonadales	f__Sinobacteraceae	g__(Sinobacteraceae)	0	0	0	0	0	0	0	0	0	0	0	0	0	0	0	0	0	0	0	0	0	0	0	0	0	0	0	0	0	0	0	0	0	0	0	0	0	0	0	0	0	0	0	0
k__Bacteria	p__Proteobacteria	c__Gammaproteobacteria	o__Xanthomonadales	f__Xanthomonadaceae	Other Xanthomonadaceae	0	0	0	0	0	0	0	0	0	0	0	0	0	0	0	0	0	0	0	0	0	0	0	0	0	0	0	0	0	0	0	0	0	0	0	0	0	0	0	0	0	0	0	0
k__Bacteria	p__Proteobacteria	c__Gammaproteobacteria	o__Xanthomonadales	f__Xanthomonadaceae	g__ (Xanthomonadaceae)	0	0	0	0	0.0011819	0	0	0	0	0	0	0	0	0	0	0	0	0	0	0	0	0	0	0	0.00129446	0	0	0	0	0	0	0	0	0	0	0.000393967	0	0	0	0	0	0.000731652	0	0
k__Bacteria	p__Proteobacteria	c__Gammaproteobacteria	o__Xanthomonadales	f__Xanthomonadaceae	g__Stenotrophomonas	0	0	0	5.6281e-05	0	0	0	0	0	0.000168843	0	0	0	0	0	0	0	0	0	0	0	0	0	0	0.00135074	0	0	0	0	0	0	0.0011819	5.6281e-05	0	0	0	0	0	0	0	0	5.6281e-05	0	0
k__Bacteria	p__Spirochaetes	c__Spirochaetes	o__Spirochaetales	f__Spirochaetaceae	g__Treponema	0	0	0	0	0	0	0	0	0	0	0	0	0	0	0	0	0	0	0	0	0	0	0	0	0	0	0	0	0	0	0	0	0	0	0	0	0	0	0	0	0	0	0	0
k__Bacteria	p__Spirochaetes	c__[Brachyspirae]	o__[Brachyspirales]	f__Brachyspiraceae	g__(Brachyspiraceae)	0	0	0	0	0	0	0	0	0	0	0	0	0	0	0	0	0	0	0	0	0	0	0	0	0	0	0	0	0	0	0	0	0	0	0	0	0	0	0	0	5.6281e-05	0	0	0
k__Bacteria	p__Synergistetes	c__Synergistia	o__Synergistales	f__Dethiosulfovibrionaceae	g__Aminobacterium	0	0	0	0	0	0	0	0	0	0	0	0	0	0	0	0	0	0	0	0	0	0	0	0	0	0	0	0	0	0	0	0	0	0	0	0	0	0	0	0	0	0	0	0
k__Bacteria	p__Synergistetes	c__Synergistia	o__Synergistales	f__Synergistaceae	Other Synergistaceae	0	0	0	5.6281e-05	0	0	0	0	0	0	0	0	0	0	0	0	0	0	0	0	0	0	0.000112562	0	0	0	0	0	0	0	0	0	0	0	0	0	0	0	0	0	0	0	0	0
k__Bacteria	p__Synergistetes	c__Synergistia	o__Synergistales	f__Synergistaceae	g__Cloacibacillus	0	0	0	0.000112562	0	0	0	0	0	0	0	0	0	0	0	0	0	0	0	0	0	0	0	0	0	0	0	0	0	0	0	0	0	0	0	0	0	0	0	0	0	0	0	0
k__Bacteria	p__Synergistetes	c__Synergistia	o__Synergistales	f__Thermovirgaceae	g__(Thermovirgaceae)	0	0	0	0	0	0	0	0	0	0	0	0	0	0	0	0	0	0	0	0	0	0	0	0	0	0	0	0	0	0	0	0	0	0	0	0	0	0	0	0	0	0	0	0
k__Bacteria	p__Tenericutes	c__Mollicutes	o__Mycoplasmatales	f__Mycoplasmataceae	g__Mycoplasma	0	0	0	0	0	0	0	0	0	0	0	0	0	0	0	0	0	0	0	0	0	0	0	0	0	0	0	0.000112562	0	0	0	0	0	0	0	0	0	0	0	0	0	0	0	0
k__Bacteria	p__Tenericutes	c__Mollicutes	o__RF39	f__	g__(Mollicutes)	0	0	0	0	0	0	0	0	0.0146893	0.0444057	0	0	0	0	0	5.6281e-05	0	0	0	0	0	0	0.00545925	0.000506529	0	0	0	0	0	0	0	0.0317425	0	0.000844214	0	0	0.0131697	0.00540297	0	0.00726024	0	0	0	0
k__Bacteria	p__Tenericutes	c__RF3	o__ML615J-28	f__	g__(Tenericutes)	0.0020824	0	0	0	0	0	0	0	0	0	0.0026452	0	0	0	0	0	0.000900495	0	0	0	0	0	0.0035457	0	0.000619091	0	0	0	0	0	0	0	0	0	0	0	0.015027	0	0	0.000281405	0	0	0	0
k__Bacteria	p__Thermotogae	c__Thermotogae	o__Thermotogales	f__Thermotogaceae	g__AUTHM297	0	0	0	0	0	0	0	0	0	0	0	0	0	0	0	0	0	0	0	0	0	0	0	0	0	0	0	0	0	0	0	0	0	0	0	0	0	0	0	0	0	0	0	0
k__Bacteria	p__Verrucomicrobia	c__Opitutae	o__Opitutales	f__Opitutaceae	g__(Optitutaceae)	0	0	0	0	0	0	0	0	0	0	0	0	0	0	0	0	0	0	0	0	0	0	0	0	0	0	0	0	0	0	0	0	0	0	0	0	0	0	0	0	0	0	0	0
k__Bacteria	p__Verrucomicrobia	c__Opitutae	o__[Cerasicoccales]	f__[Cerasicoccaceae]	g__(Cerasicoccaceae)	0	0	5.6281e-05	0	0	0	0	0	0	0	0	0	0	0	0	0	0	0	0	0.000168843	0	0	0	0	0	0	0	0	0	0	0	0.0114813	0	0	0	0	0.00253264	0	0	0	0	0	0	0
k__Bacteria	p__Verrucomicrobia	c__Verrucomicrobiae	o__Verrucomicrobiales	f__Verrucomicrobiaceae	g__Akkermansia	0.0337686	0	0.0142954	0.000450248	0.00219496	0	0	0	0	0	5.6281e-05	0.0880234	0.000225124	0	0	0	0	0	0.00258892	0.12652	0	0	0.011819	0.000619091	0	0	0.00123818	0	0	0	0	0.000168843	5.6281e-05	0	5.6281e-05	0	0.0106371	0	0	5.6281e-05	5.6281e-05	0.0507654	0.00816074	0
k__Bacteria	p__Verrucomicrobia	c__[Pedosphaerae]	o__[Pedosphaerales]	f__R4-41B	g__(Verrucomicrobia)	0	0	0	0	0	0	0	0	0	0	0	0	0	0	0	0	0	0	0	0	0	0	0	0	0	0	0	0	0	0	0	0	0	0	0	0	0	0	0	0	0	0	0	0
k__Bacteria	p__WWE1	c__[Cloacamonae]	o__[Cloacamonales]	f__[Cloacamonaceae]	g__W22	0	0	0	0	0	0	0	0	0	0	0	0	0	0	0	0	0	0	0	0	0	0	0	0	0	0	0	0	0	0	0	0	0	0	0	0	0	0	0	0	0	0	0	0
k__Bacteria	p__WWE1	c__[Cloacamonae]	o__[Cloacamonales]	f__[Cloacamonaceae]	g__W5	0	0	0	0	0	0	0	0	0	0	0	0	0	0	0	0	0	0	0	0	0	0	0	0	0	0	0	0	0	0	0	0	0	0	0	0	0	0	0	0	0	0	0	0
k__Bacteria	p__[Thermi]	c__Deinococci	o__Deinococcales	f__Deinococcaceae	g__Deinococcus	0	0	0	0	0	0	0	0	0	0	0	0	0	0	0	0	0	0	0	0	0	0	0	0	0	0	0	0	0	0	0	0.000393967	0	0	0	0	0	0	0	0	0	0	0	0
[truncated: 38 more columns]
